# Supplementary material for: Nitrate radicals and biogenic volatile organic compounds: oxidation, mechanisms, and organic aerosol
Source: PubMed Central journal article supplement (PMC6104845; doi:10.5194/acp-17-2103-2017), 2017
Supplement: NIHMS982684-supplement-supp.pdf [file NIHMS982684-supplement-supp.pdf]

Supplement of Atmos. Chem. Phys., 17, 2103–2162, 2017  
<http://www.atmos-chem-phys.net/17/2103/2017/>  
doi:10.5194/acp-17-2103-2017-supplement  
© Author(s) 2017. CC Attribution 3.0 License.

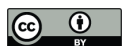

Atmospheric  
Chemistry  
and Physics  
Open Access  
EGU

*Supplement of*

## **Nitrate radicals and biogenic volatile organic compounds: oxidation, mechanisms, and organic aerosol**

**Nga Lee Ng et al.**

*Correspondence to:* Nga Lee Ng ([ng@chbe.gatech.edu](mailto:ng@chbe.gatech.edu)) and Steven S. Brown ([steven.s.brown@noaa.gov](mailto:steven.s.brown@noaa.gov))

The copyright of individual parts of the supplement might differ from the CC-BY 3.0 licence.

### Supplementary Info to section 2.3

The lifetime ( $\tau$ ) of a single component, liquid organic particle with respect to loss by reaction with  $\text{NO}_3$  at concentration  $[\text{NO}_3]$  is partially governed by the uptake coefficient ( $\gamma$ ) (Robinson et al., 2006; Gross et al., 2009b):

$$\tau_{liquid} = \frac{2\rho_{org}N_A D_p}{3M_{org}\bar{c}\gamma[\text{NO}_3]} \quad (1)$$

Where  $D_p$  is the particle diameter,  $\rho_{org}$  and  $M_{org}$  are the density and molecular weight of the organic component, respectively and  $\bar{c}$  is the mean molecular velocity of gas-phase  $\text{NO}_3$ . Thus defined,  $\tau$  is the time required for all the organic molecules in a spherical (i.e. liquid) particle to be oxidised once. The lifetimes of some particle bound, low volatility organics can be reduced to seconds at night time due to the reaction of  $\text{NO}_3$  whilst daytime lifetimes are significantly longer (Kaiser et al., 2011).

For a solid particle, the following expression has been used (Gross et al., 2009a)

$$\tau_{solid} = \frac{N_{tot}}{\bar{c}\gamma[\text{NO}_3]} \quad (2)$$

Where  $N_{tot}$  is the number of organic molecules on the surface.

For a reactive organic coating on a non-reactive core the following expression has been used to derive the uptake coefficient:

$$\gamma = \frac{(R_p^3 - R_c^3)\rho_{org}N_A\eta_{org}}{3M_{org}R_p D \bar{c} t} \quad (3)$$

Where  $R_p$  and  $R_c$  are the radii of the particle and the non-reactive core, respectively.  $\eta_{org}$  is the ratio of consumption of the organic species per  $\text{NO}_3$  reaction,  $D$  is the diffusion coefficient of  $\text{NO}_3$  to the particle and  $t$  is the average  $\text{NO}_3$  exposure ( $\text{molecule cm}^{-3} \text{ s}^{-1}$ ).

If the reaction takes place throughout the particle, the uptake of  $\text{NO}_3$  may be parameterised in terms of bulk accommodation and reaction within a resistor framework (Hanson et al., 1994):

$$\frac{1}{\gamma} = \left\{ \frac{1}{\alpha_b} + \frac{\bar{c}}{4HRT(D_b k'_{org})^{0.5}} \right\} \quad (4)$$

Where  $\alpha_b$  is the bulk accommodation coefficient,  $H$  is the solubility,  $D_b$  is the bulk-phase diffusion coefficient of  $\text{NO}_3$  and  $k'_{org}$  is the pseudo first order rate coefficient for reaction of  $\text{NO}_3$  with the organic component of interest and is usually proportional to its concentration.

For aqueous particles and surfaces, the diffusion of  $\text{NO}_3$  through the liquid is characterised by a value of  $D_b$  which is close to  $1 \times 10^{-5} \text{ cm}^2 \text{ s}^{-1}$ . For gas uptake by amorphous (semi-)solid organics, inhomogeneous mixing with strong concentration gradients is expected in the bulk phase. In such case, more complex depth-resolved kinetic models (Pöschl et al., 2007; Pfrang et al., 2010; Shiraiwa et al., 2010; Shiraiwa et al., 2012; Roldin et al., 2014) are required that treat bulk diffusion and chemical reactions at the surface and in the bulk to fully evaluate the uptake and reaction of  $\text{NO}_3$ . The key kinetic input parameters include the second-order surface and bulk reaction rate coefficients between  $\text{NO}_3$  and organics (see section 2c2), the bulk diffusion coefficients of  $\text{NO}_3$  and organics as well as the surface accommodation coefficient of  $\text{NO}_3$  ( $\alpha_s$ ), desorption lifetime of  $\text{NO}_3$  ( $\tau_d$ ), and Henry's law coefficient for  $\text{NO}_3$  ( $K_{\text{sol,cc}}$ ). Typical ranges for these parameters the interactions between organic surfaces and  $\text{NO}_3$  are:  $\alpha_s = 10^{-3} - 1$ ,  $\tau_d = 10^{-10} - 1$ , and  $K_{\text{sol,cc}} = 10^{-4} - 10^{-3} \text{ mol cm}^{-3} \text{ atm}^{-1}$  (Shiraiwa et al., 2012). These parameters can be estimated by quantum chemical calculations such as molecular dynamic simulations and density functional theory. Otherwise, they need to be constrained by fitting experimental data using the depth-resolved kinetic models.

**Table S1** Summary of experimental measurements of uptake coefficients and products formed in the interaction of NO<sub>3</sub> with organic surfaces.

| Organic surface or particle             | Methods                          | $\gamma$ ( $10^{-3}$ ) | Products / Comments                                                                                    | Reference                                       |
|-----------------------------------------|----------------------------------|------------------------|--------------------------------------------------------------------------------------------------------|-------------------------------------------------|
| <b>Alkanes</b>                          |                                  |                        |                                                                                                        |                                                 |
| n-hexadecane [1]                        | CWFT, ( <i>l</i> )               | 2.6 ± 0.8 (293 K)      | Uptake coefficient greatly reduced for frozen samples. <b>N1</b>                                       | (Moise et al., 2002)                            |
| n-hexadecane [2]                        | CWFT, (SAM)                      | 14 ± 2 (293 K)         | RH ~0 %, In the absence of O <sub>2</sub>                                                              | (Knopf et al., 2006)                            |
| squalane [3]                            | CWFT, ( <i>l</i> )               | 5.2 ± 0.4 (278 K)      |                                                                                                        | (Xiao and Bertram, 2011)                        |
| squalane [4]                            | AFT, in N <sub>2</sub><br>VUV-MS | < 7.8 (293 K)          | 100 nm diameter particles of pure squalene. Gas-phase NO <sub>2</sub> observed at close to unit yield. | (Lee et al., 2013)                              |
| 1-octadecanethiol                       | CWFT, (SAM)<br>IR, SIMS          | 298 K                  | RONO <sub>2</sub> formation on the surface observed. <b>N2</b>                                         | (Gross and Bertram, 2009)                       |
| 1-octadecanethiol [5]                   | CWFT, (SAM)<br>XPS,              | 0.88 ± 0.225 (298 K)   | Conversion of alkane to oxidized, condensed phase organics.                                            | (Knopf et al., 2006)                            |
| heptamethyl nonane [6]                  | CWFT, ( <i>l</i> )               | 2.1 ± 0.8 (253 K)      | Uptake coefficient greatly reduced for frozen samples. <b>N1</b>                                       | (Moise et al., 2002)                            |
| <b>Saturated alcohols and carbonyls</b> |                                  |                        |                                                                                                        |                                                 |
| <i>n</i> -octanoic [8]                  | CWFT, ( <i>l</i> )               | 2.1 ± 0.3 (290 K)      |                                                                                                        | (Moise et al., 2002)                            |
| 1-octanol [9]                           | CWFT, ( <i>l</i> )               | 7.1 ± 1.6 (258 K)      |                                                                                                        | (Moise et al., 2002)                            |
| glycerol [10]                           | CWFT, ( <i>l</i> )               | 0.8 – 1.7 (268-293 K)  |                                                                                                        | (Gross and Bertram, 2009)                       |
| 16-mercapto-1-hexadecanol [11]          | UHV, (SAM)<br>RAIRS              | 6 ± 1 <b>N3</b>        | Organic nitrates formed simultaneously with loss of terminal CH <sub>2</sub> OH groups.                | (Zhang and Morris, 2015)                        |
| Levoglucofan [12]                       | CWFT, ( <i>s</i> )               | ~1.4 (298 K) <b>N4</b> | RH < 0.5 %, O <sub>2</sub> present.                                                                    | (Knopf et al., 2011)<br>(Shiraiwa et al., 2009) |
| Diethyl sebacate (DES) [13]             | CWFT, ( <i>l</i> )               | 3.5 – 4.5 (278-298 K)  |                                                                                                        | (Gross and Bertram, 2009)                       |
| Diethyl sebacate (DES) [14]             | CWFT, ( <i>l</i> )               | 4.4 ± 0.4 (278 K)      |                                                                                                        | (Xiao and Bertram, 2011)                        |
| Diethyl sebacate (DOS) [15]             | CWFT, ( <i>l</i> )               | 3.9 ± 0.3 (278 K)      |                                                                                                        | (Xiao and Bertram, 2011)                        |
| Tridecanal (in DES)                     | CWFT, ( <i>l</i> )               | ~1.4-12 (275 K)        | ~0.06-0.27 mol L <sup>-1</sup> tridecanal                                                              | (Iannone et al., 2011)                          |
| Tridecanal (in DOS)                     | CWFT, ( <i>l</i> )               | ~0.5-5 (275 K)         | ~0.02-0.11 mol L <sup>-1</sup> tridecanal                                                              | (Iannone et al., 2011)                          |
| Tridecanal (in squalene)                | CWFT, ( <i>l</i> )               | ~0-1 (275 K)           | ~0.02-0.1 mol L <sup>-1</sup> tridecanal                                                               | (Iannone et al., 2011)                          |

| Alkenes                     |                                                |                                             |                                                                                                                                                                                       |                                                 |
|-----------------------------|------------------------------------------------|---------------------------------------------|---------------------------------------------------------------------------------------------------------------------------------------------------------------------------------------|-------------------------------------------------|
| 1-octadecene [17]           | CWFT, ( <i>l</i> )                             | 1.6 ± 0.3 (293 K)                           |                                                                                                                                                                                       | (Moise et al., 2002)                            |
| 1-hexadecene [18]           | CWFT, ( <i>l</i> )                             | 2.3 ± 0.9 (277 K)                           |                                                                                                                                                                                       | (Moise et al., 2002)                            |
| 7-tetradecene [19]          | CWFT, ( <i>l</i> )                             | 5.8 ± 2.0 (246 K)                           |                                                                                                                                                                                       | (Moise et al., 2002)                            |
| Methyl oleate [20]          | CWFT, ( <i>l</i> )                             | 140 <sup>+860</sup> <sub>-50</sub> (278 K)  |                                                                                                                                                                                       | (Xiao and Bertram, 2011)                        |
| Methyl oleate (in DES)      | CWFT, ( <i>l</i> )                             | 15-95 (278 K)                               | ~ 0.3- 2.3 wt % methyl oleate                                                                                                                                                         | (Xiao and Bertram, 2011)                        |
| Methyl oleate (in DOS)      | CWFT, ( <i>l</i> )                             | 15 – 30 (278 K)                             | ~ 0.6 – 2.6 wt % methyl oleate                                                                                                                                                        | (Xiao and Bertram, 2011)                        |
| methyl oleate (in squalane) | CWFT, ( <i>l</i> )                             | 10-25 (278 K)                               | ~ 0.7 – 3.1 wt % methyl oleate                                                                                                                                                        | (Xiao and Bertram, 2011)                        |
| Undec-10-ene-1-thiol [21]   | CWFT, (SAM)                                    | 34 <sup>+44</sup> <sub>-18</sub> (298 K)    | γ decreased (> factor 10) with reaction time as number of double bonds were depleted. Condensed phase products were organonitrates and carbonyls.                                     | (Gross and Bertram, 2009)                       |
| Squalene [22]               | AFT, in N <sub>2</sub> ( <i>lp</i> )<br>VUV-MS | 180 ± 30 (293 K)                            | γ (calculated assuming that only NO <sub>3</sub> was lost to surface) increased (to 820 ± 110) with reaction time.                                                                    | (Lee et al., 2013)                              |
| 17-octadecene-1-thiol [23]  | UHV, (SAM)<br>RAIRS, XPS                       | 2.3 ± 0.5                                   | Reaction at terminal double bond to form organic nitrate via addition. N3                                                                                                             | (Zhang et al., 2014c)                           |
|                             |                                                |                                             |                                                                                                                                                                                       |                                                 |
| Unsaturated Acids           |                                                |                                             |                                                                                                                                                                                       |                                                 |
| Abietic [25]                | CWFT, ( <i>s</i> )                             | ~3 (298 K)                                  | RH < 0.5 % N5                                                                                                                                                                         | (Knopf et al., 2011)<br>(Shiraiwa et al., 2012) |
| Linoleic (conj.) [26]       | CWFT, ( <i>l</i> )                             | 7.9 ± 1.2 (273 K)                           |                                                                                                                                                                                       | (Moise et al., 2002)                            |
| Linoleic (unconj.) [27]     | CWFT, ( <i>l</i> )                             | 15.0 ± 2.0 (288 K)                          |                                                                                                                                                                                       | (Moise et al., 2002)                            |
| Linoleic (conj.) [28]       | AFT, ( <i>lp</i> )                             | 1010 ± 180 (295 K)                          |                                                                                                                                                                                       | (Zhao et al., 2011)                             |
| Linoleic [29]               | CWFT, ( <i>l</i> )                             | 400 <sup>+450</sup> <sub>-310</sub> (298 K) | RH ~ 0 %, In the absence of O <sub>2</sub>                                                                                                                                            | (Knopf et al., 2011)                            |
| Linoleic (unconj.) [30]     | AFT, ( <i>lp</i> )                             | 530 ± 120 (295 K)                           |                                                                                                                                                                                       | (Zhao et al., 2011)                             |
| Linoleic (conj.) [31]       | CWFT, ( <i>l</i> )                             | >120 (278-298 K)                            |                                                                                                                                                                                       | (Gross et al., 2009a)                           |
| Linoleic (unconj.) [32]     | CWFT, ( <i>l</i> )                             | >130 (288 K)                                |                                                                                                                                                                                       | (Gross et al., 2009a)                           |
| Linolenic [33]              | AFT, ( <i>lp</i> )                             | 720 ± 170 (295 K)                           |                                                                                                                                                                                       | (Zhao et al., 2011)                             |
| Oleic                       | ATR-IR, GC-MS, LC-MS ( <i>l</i> )              | (298 K)                                     | Products are carbonyl compounds which contain -ONO <sub>2</sub> , -O <sub>2</sub> NO <sub>2</sub> and -NO <sub>2</sub> functional groups. Also high molecular weight products formed. | (Hung et al., 2005)                             |
| Oleic [34]                  | AFT, ( <i>lp</i> )                             | 270 ± 60 (295 K)                            | In the presence of O <sub>2</sub> , products are organo-nitrate (acid) with alcohol and carbonyl functional groups.                                                                   | (Zhao et al., 2011)                             |
| Oleic [35]                  | AFT, ( <i>lp</i> )                             | 140 ± 30                                    | Experiment conducted at room temperature                                                                                                                                              | (Renbaum-Wolff et al., 2013)                    |
| Oleic [36]                  | CWFT, ( <i>l</i> )                             | 290 <sup>+710</sup> <sub>-210</sub> (288 K) | RH ~0 %, In the absence of O <sub>2</sub>                                                                                                                                             | (Knopf et al., 2011)                            |
| Oleic [37]                  | CWFT, ( <i>l</i> )                             | >70 (285-302 K)                             |                                                                                                                                                                                       | (Gross et al., 2009a)                           |
| Aromatics and PAHs          |                                                |                                             |                                                                                                                                                                                       |                                                 |

|                        |                                               |                                                                                                |                                                                                                                                                                                                 |                                             |
|------------------------|-----------------------------------------------|------------------------------------------------------------------------------------------------|-------------------------------------------------------------------------------------------------------------------------------------------------------------------------------------------------|---------------------------------------------|
| Pyrene                 | Coated Glass Fibre Filter ( <i>s</i> )        |                                                                                                | Formation (yield of ~ 100%) of 1-nitropyrene attributed to reaction with N <sub>2</sub> O <sub>5</sub> .                                                                                        | (Pitts et al., 1984)                        |
| Pyrene [39]            | CWFT, ( <i>s</i> )                            | >100 (293 K)                                                                                   |                                                                                                                                                                                                 | (Atkinson et al., 1995)                     |
| Pyrene [40]            | CWFT, ( <i>s</i> )                            | 380 <sup>+620</sup> <sub>-300</sub> (273 K)<br>790 <sup>+210</sup> <sub>-670</sub> (293-297 K) | Initial uptake coefficient on a fresh surface. $\gamma$ decreased with NO <sub>3</sub> exposure at 263 K but not at 297 K. HNO <sub>3</sub> and NO <sub>2</sub> observed as gas-phase products. | (Gross and Bertram, 2008b)                  |
| Pyrene                 | XPS, DRIFTS, GC-MS                            |                                                                                                | Pyrene on a Teflon disc. Nitropyrene observed and attributed to reaction with NO <sub>3</sub> /and/or N <sub>2</sub> O <sub>5</sub> .                                                           | (Atkinson et al., 1990)                     |
| Pyrene                 | AFT, ( <i>lp</i> )<br>VUV-AMS<br>GC-MS        |                                                                                                | Pyrene coated on an azelaic acid particle. Bulk samples coated on glass. Main product is 1-nitro-pyrene. <b>N6</b>                                                                              | (Atkinson et al., 1988)                     |
| Pyrene [41]            | Chamber, ( <i>lp</i> )<br>VUV-AMS             | 370 (287 K)                                                                                    | Pyrene coated on an azelaic acid particle. 1-nitropyrene. <b>N7</b>                                                                                                                             | (Atkinson et al., 1984)                     |
| Pyrene                 | Chamber, ( <i>lp</i> )<br>VUV-AMS<br>GC-MS    |                                                                                                | 2-nitropyrene formed at RH = 0.5 %, 1-nitropyrene observed at RH = 43 % <b>N8</b>                                                                                                               | (Atkinson et al., 1985;Zhang et al., 2014a) |
| Benz[a]pyrene          | 10L glass bulb<br>AMS                         |                                                                                                | Nitrated benz[a]pyrene. <b>N9</b>                                                                                                                                                               | (Lu et al., 2011)                           |
| 1-nitro-pyrene [42]    | Chamber, ( <i>lp</i> )<br>VUV-AMS             | 60 (287 K)                                                                                     | 1-nitro-pyrene coated on an azelaic acid particle. 1,3-, 1,6-, and 1,8-dinitropyrenes observed. <b>N7</b>                                                                                       | (Atkinson et al., 1984)                     |
| 1-hydroxy-pyrene [43]  | Chamber, ( <i>lp</i> )<br>VUV-AMS             | 570 (287 K)                                                                                    | 1-hydroxy-pyrene coated on an azelaic acid particle. <b>N7</b>                                                                                                                                  | (Atkinson et al., 1984)                     |
| Anthracene             | AFT, ( <i>lp</i> )<br>VUV-AMS<br>GC-MS        |                                                                                                | Anthracene coated on an azelaic acid particle. Bulk samples coated on glass. Main product is 9-nitro-anthracene. <b>N10</b>                                                                     | (Atkinson et al., 1988)                     |
| Anthracene             | XPS, DRIFTS, GC-MS XPS,                       |                                                                                                | Anthracene on a Teflon disc. 9-Nitroanthracene observed and attributed to reaction with NO <sub>3</sub> /and/or N <sub>2</sub> O <sub>5</sub> .                                                 | (Atkinson et al., 1990)                     |
| Benz[a]anthracene [44] | CWFT, ( <i>s</i> )                            | 59 <sup>+110</sup> <sub>-49</sub> (273 K)<br>130 <sup>+530</sup> <sub>-96</sub> (293-297 K)    | Initial uptake coefficient on a fresh surface. $\gamma$ decreased with NO <sub>3</sub> exposure rapidly at 263 K, more slowly at 297 K.                                                         | (Gross and Bertram, 2008b)                  |
| Benz[a]anthracene      | AFT, ( <i>lp</i> )<br>VUV-AMS<br>GC-MS        |                                                                                                | Benz[a]anthracene coated on an azelaic acid particle. Bulk samples coated on glass. Products are benz[a]anthracene-7,12-dione and mono-nitrobenz[a]anthracene.                                  | (Atkinson et al., 1988)                     |
| Benz[a]anthracene [45] | Chamber, ( <i>lp</i> )<br>VUV-AMS             | 290 (287 K)                                                                                    | Benz[a]anthracene coated on an azelaic acid particle. 7-Nitrobenzo(a)anthracene and benzo(a)anthracene-7,12-dione observed. <b>N7</b>                                                           | (Atkinson et al., 1984)                     |
| Perylene               | Coated Glass Fibre Filter Filter ( <i>s</i> ) |                                                                                                | No reaction products attributable to N <sub>2</sub> O <sub>5</sub> or NO <sub>3</sub> uptake observed.                                                                                          | (Baker et al., 2004)                        |

|                         |                                            |                           |                                                                                                                                                                                                            |                              |
|-------------------------|--------------------------------------------|---------------------------|------------------------------------------------------------------------------------------------------------------------------------------------------------------------------------------------------------|------------------------------|
| Fluoranthene [46]       | CWFT, ( <i>s</i> )                         | $87^{+280}_{-63}$ (273 K) | Initial uptake coefficient on a fresh surface. $\gamma$ decreased with NO <sub>3</sub> exposure at 263 K but not at 297 K.                                                                                 | (Gross and Bertram, 2008b)   |
| Fluoranthene            | Chamber, ( <i>lp</i> )<br>VUV-AMS<br>GC-MS |                           | 2-nitro-fluoranthene formed at RH = 0.5 %<br>1-,3-, 7-, and 8-nitrofluoranthene observed at RH = 43 %, <b>N8</b>                                                                                           | (Zhang et al., 2014b)        |
| Phenanthrene            | AFT, ( <i>lp</i> )<br>VUV-AMS<br>GC-MS     |                           | Phenanthrene coated on an azelaic acid particle. Bulk samples coated on glass. Main products are mono-nitrophenanthracenes. <b>N11</b>                                                                     | (Atkinson et al., 1988)      |
| Carbaryl                | AFT, ( <i>lp</i> )<br>VUV-AMS              |                           | Carbaryl coated on an azelaic acid particle. Initial product is (nitro-1-naphthyl) M-methylcarbamate. <b>N12</b>                                                                                           | (Barnes et al., 1990)        |
| Syringaldehyde [47]     | Chamber, ( <i>lp</i> )<br>VUV-AMS<br>GC-MS | 330                       | Syringaldehyde coated on an azelaic acid particle. 2,6-dimethoxybenzoquinone produced. seen as product following H-abstraction by NO <sub>3</sub> . <b>N13</b>                                             | (Atkinson et al., 1984)      |
| Vanillic acid [48]      | Chamber, ( <i>lp</i> )<br>VUV-AMS          | 310                       | Vanillic acid coated on an azelaic acid particle. 4,6-dinitroguaiacol and protocatechuic acid observed. <b>N14</b>                                                                                         | (Atkinson et al., 1984)      |
| Coniferyl aldehyde [49] | Chamber, ( <i>lp</i> )<br>VUV-AMS          | 280                       | Coniferyl aldehyde coated on an azelaic acid particle. Products observed formed via a combination of abstraction and addition reactions of NO <sub>3</sub> . <b>N15</b>                                    | (Atkinson et al., 1984)      |
| Chrysene [50]           | Chamber, ( <i>lp</i> )<br>VUV-AMS<br>GC/MS | 180 (287 K)               | Chrysene coated on an azelaic acid particle. 6-nitrochrysene and dinitrochrysene observed. <b>N7</b>                                                                                                       | (Atkinson et al., 1984)      |
| Triphenylene            | AFT, ( <i>lp</i> )<br>VUV-AMS<br>GC-MS     |                           | Triphenylene coated on an azelaic acid particle. Bulk samples coated on glass. Products are 1-nitrotriphenylene (major) and 2-nitrotriphenylene.                                                           | (Benter and Schindler, 1988) |
| Nitroguaiacol [51]      | CWFT, ( <i>s</i> )                         | ~22 (298 K) <b>N16</b>    | RH < 0.5 %                                                                                                                                                                                                 | (Knopf et al., 2011)         |
| Deuterated PAHs         | Filter<br>GC-MS                            |                           | Equal parts mixture of deuterated Pyrene, Fluoranthene and Triphenylene. Deuterated 1-nitro-pyrene and 8-nitro-fluoranthene were major products. <b>N10</b>                                                | (Berndt and Boge, 1997)      |
| Ambient PAHs            | Filter<br>GC-MS                            |                           | Collection of ambient particles and subsequent exposure to NO <sub>3</sub> /N <sub>2</sub> O <sub>5</sub> . Nitropyrenes, nitrofluoranthenes, anthracene, nitro-chrysene and nitrobenzo(a)pyrene observed. | (Berndt and Boge, 1997)      |
| <b>Other</b>            |                                            |                           |                                                                                                                                                                                                            |                              |
| SOA (limonene)          | Chamber, ( <i>lp</i> )                     | 50-200 (295 K)            | $\gamma$ derived by modelling NO <sub>3</sub> and particle composition                                                                                                                                     | (Fry et al., 2011)           |

**Numbering:** The number in square brackets following the organic name refers to the number on the x-axis of Figure 3 in the manuscript.

**Surface state:** *l* = liquid, *lp* = liquid particle, *s* = solid, SAM = self-assembled monolayer.

**Methods:** AFT = Aerosol flow tube, IR = Infra-red, ATR = Attenuated total reflection, CWFT = coated wall flow tube, SIMS = secondary ion mass spectrometry, VUV-AMS = vacuum ultraviolet photoionisation aerosol mass spectrometry, UHV = ultra high vacuum chamber, RAIRS = reflection absorption infrared spectroscopy, XPS = X-ray photoelectron spectroscopy.

**Chemicals:** 1-octadecanethiol is C<sub>18</sub>H<sub>38</sub>S. Abeitic acid (C<sub>20</sub>H<sub>30</sub>O<sub>2</sub>) is Abieta-7,13-dien-18-oic acid. Anthracene is C<sub>14</sub>H<sub>10</sub> (Tricyclo[8.4.0.0<sup>3,8</sup>]tetradeca-1,3,5,7,9,11,13-heptaene). Anthrone is C<sub>14</sub>H<sub>10</sub>O (10*H*-Anthracen-9-one). Benzo[*a*]anthracene is C<sub>18</sub>H<sub>12</sub>. Benzo[*a*]pyrene is C<sub>20</sub>H<sub>12</sub>. Carbaryl is C<sub>12</sub>H<sub>11</sub>NO<sub>2</sub> (1-naphthyl methylcarbamate). Chrysene (C<sub>18</sub>H<sub>12</sub>) is 1,2-Benzophenanthrene. Coniferyl aldehyde, C<sub>10</sub>H<sub>10</sub>O<sub>3</sub>, is a <sup>methoxyphenol</sup> ((*Z* or *E*)-3-(4-hydroxy-3-methoxyphenyl)prop-2-enal). DES (di-ethyl sebacate) is C<sub>2</sub>H<sub>5</sub>OC(O)(CH<sub>2</sub>)<sub>8</sub>C(O)OC<sub>2</sub>H<sub>5</sub>. DOS (di-octyl sebacate) is (CH<sub>2</sub>)<sub>8</sub>(C(O)OC<sub>8</sub>H<sub>17</sub>)<sub>2</sub>. Fluoranthene is C<sub>16</sub>H<sub>10</sub>. Levoglucosan (C<sub>6</sub>H<sub>10</sub>O<sub>5</sub>) is (1*R*,2*S*,3*S*,4*R*,5*R*)-6,8-Dioxabicyclo[3.2.1]octane-2,3,4-triol. Linoleic acid is C<sub>18</sub>H<sub>32</sub>O<sub>2</sub> ((9*Z*,12*Z*)-9,12-octadecadienoic acid). Linoleic acid (conj.) is a mixture of *cis*- and *trans*-9,11 octadecadienoic acid and -10,12 octadecadienoic acid. Linolenic acid is C<sub>18</sub>H<sub>30</sub>O<sub>2</sub> ((9*Z*,12*Z*,15*Z*)-9,12,15-octadecatrienoic acid). Methyl oleate is CH<sub>3</sub>(CH<sub>2</sub>)<sub>7</sub>CH=CH(CH<sub>2</sub>)<sub>7</sub>CO<sub>2</sub>CH<sub>3</sub>. Nitroguaiacol (C<sub>7</sub>H<sub>7</sub>NO<sub>4</sub>) is 2-methoxy-5-nitrophenol. Oleic acid is C<sub>18</sub>H<sub>34</sub>O<sub>2</sub>, ((9*Z*)-Octadec-9-enoic acid). PAHs = polycyclic aromatic hydrocarbons. Phenanthrene is C<sub>14</sub>H<sub>10</sub> (Tricyclo[8.4.0.0<sup>2,7</sup>]tetradeca-1,3,5,7,9,11,13-heptaene). Pyrene is C<sub>16</sub>H<sub>10</sub> (benzo[*def*]phenanthrene). SOA (limonene) is secondary organic aerosol formed by reaction with limonene with both O<sub>3</sub> and NO<sub>3</sub>. Squalane is C<sub>30</sub>H<sub>62</sub> (2,6,10,15,19,23-Hexamethyltetracosane). Squalene (triterpene with 6 double bonds) is (6*E*,10*E*,14*E*,18*E*)-2,6,10,15,19,23-hexamethyltetracosane-2,6,10,14,18,22-hexaene. Syringaldehyde, C<sub>9</sub>H<sub>10</sub>O<sub>4</sub>, is a methoxyphenol (4-Hydroxy-3,5-dimethoxybenzaldehyde). Triphenylene (C<sub>18</sub>H<sub>12</sub>) is 9,10-benzophenanthrene. Undec-10-ene-1-thiol is C<sub>11</sub>H<sub>22</sub>S. Vanillic acid, C<sub>8</sub>H<sub>8</sub>O<sub>4</sub>, is a methoxyphenol (4-Hydroxy-3-methoxybenzoic acid).

**Comments:** **N1.** n-hexadecane: Uptake coefficient decreased by a factor ~7 when the surface was frozen at 283-289 K, which was attributed to the reduced rate of diffusion of NO<sub>3</sub> into the bulk sample. **N2.** Reaction proceeds via abstraction to form an alkyl radical, R which reacts with O<sub>2</sub> to form RO<sub>2</sub>. The peroxy radical reacts with NO<sub>3</sub> to form RO, which is converted to RONO<sub>2</sub> via reaction with NO<sub>2</sub> present. **N3.** Experiment in UHV (no O<sub>2</sub> present). Derivation of  $\gamma$  required calculation of NO<sub>3</sub> concentration close to the surface from a N<sub>2</sub>O<sub>5</sub> dosing pressure and the NO<sub>2</sub>-NO<sub>3</sub>-N<sub>2</sub>O<sub>5</sub> equilibrium. **N4.** Uptake coefficient increased (to ~ 3 × 10<sup>-3</sup>) when the NO<sub>3</sub> concentration was reduced but decreased (~ factor of 10) with exposure time as reactive sites were depleted on the solid surface of levoglucosan. The NO<sub>3</sub> concentration- and time-dependence of the uptake coefficient could be described with a multilayer model of surface and bulk reactions and bulk diffusion of NO<sub>3</sub> with a diffusion coefficient of 10<sup>-8</sup> – 10<sup>-7</sup> cm<sup>2</sup> s<sup>-1</sup>. **N5.** Uptake coefficient increased (to ~ 6 × 10<sup>-3</sup>) when the NO<sub>3</sub> concentration was reduced but decreased (~ factor of 10) with exposure time as reactive sites were depleted on the solid surface of abeitic acid. The NO<sub>3</sub> concentration- and time-dependence of the uptake coefficient could be described with a multilayer model of surface and bulk reactions and bulk diffusion of NO<sub>3</sub> with a diffusion coefficient of 10<sup>-8</sup> – 10<sup>-7</sup> cm<sup>2</sup> s<sup>-1</sup>. **N6.** Three dinitropyrenes (1,3-, 1,6- and 1,8-dinitropyrene) were also observed. **N7.**  $\gamma$  needed to be corrected to take non-diffusive transport of NO<sub>3</sub> to the particles into account, which was achieved by normalising  $\gamma$  to values obtained by (Gross and Bertram, 2008a) and (Mak et al., 2007). **N8.** Mixture of NO<sub>3</sub>/N<sub>2</sub>O<sub>5</sub> and NO<sub>2</sub>. RH dependence of yields of the different nitro-PAH isomers interpreted in terms of switch from NO<sub>3</sub> as nitration agent at low RH to N<sub>2</sub>O<sub>5</sub> (via ionisation to NO<sub>2</sub><sup>+</sup>) at high RH. Similar change could be induced by changing the NO<sub>3</sub> to N<sub>2</sub>O<sub>5</sub> ratio. At low RH the initial addition of radical to site with most electron density is followed by



NO<sub>2</sub> addition to the 2-position (ortho). At high RH the nitration occurs by electrophilic nitration by NO<sub>2</sub><sup>+</sup>. **N9**. Changes in particle optical properties observed following nitration. **N10**. Other products were anthraquinone, 1,8-dihydroxyanthraquinone, 9-10-dinitroanthracene and anthrone. **N11**. Other products were hydroxynitrates of phenanthrene. **N12**. Also observed as secondary products: (dinitro-1-naphthyl)N-methylcarbamate, (hydroxy-1-naphthyl)N-methylcarbamate and (hydroxy-nitro-1-naphthyl)N-methylcarbamate. Relative loss rate of particulate carbaryl and isoprene (g) monitored to derive an effective rate constant for NO<sub>3</sub> + particulate carbaryl of  $4.4 \times 10^{-13} \text{ cm}^3 \text{ molecule}^{-1} \text{ s}^{-1}$ . **N13**. 2,6-dimethoxybenzoquinone produced following H-abstraction by NO<sub>3</sub> and addition of O<sub>2</sub> following by further elimination of CO<sub>2</sub> and addition of NO<sub>3</sub>. **N14**. 4,6-dinitroguaiacol proposed to be formed via NO<sub>3</sub> addition followed by reactions and eliminations involving NO<sub>2</sub>, HNO<sub>3</sub> and a further NO<sub>3</sub> radical and with 5-nitrovanillic acid as intermediate product. **N15**. Oxalic acid (C<sub>2</sub>H<sub>2</sub>O<sub>4</sub>, ethanedioic acid), Vanillin (4-Hydroxy-3-methoxybenzaldehyde), 4,6-dinitroguaiacol, 5-nitrovanillin and vanillin observed. **N16**. Uptake coefficient increased (to  $\sim 30 \times 10^{-3}$ ) when the NO<sub>3</sub> concentration was reduced.  $\gamma$  was independent of exposure time, possibly due to volatilisation of surface products exposing fresh nitroguaiacol. **N17**. Also observed (in order of decreasing concentration): 3-nitro-fluoranthene, 8-nitro-fluoranthene, 7-nitro-fluoranthene and 1-nitro-fluoranthene. Authors suggest that these products are formed from N<sub>2</sub>O<sub>5</sub> rather than NO<sub>3</sub> interactions as the main gas-phase product of NO<sub>3</sub> reaction (2-nitro-fluoranthene) was only very minor. This may have been a result of the large concentration of N<sub>2</sub>O<sub>5</sub> and NO<sub>2</sub> relative to NO<sub>3</sub> used. Detection of 2-nitro-fluoranthene as dominant nitro-PAH in ambient particles led the authors to suggest that gas-phase processes were more important than particle reactions for its formation.

**Table S2.** Compilation of kinetic data on reactions of NO<sub>3</sub> with aliphatic VOCs and OVOCs in the aqueous phase taken from the CAPRAM kinetic database (Bräuer et al., 2016).

| Compound                       | SMILES string | k <sub>298</sub> <sup>(a)</sup> | A <sup>(a)</sup>     | E <sub>A</sub> /R <sup>(b)</sup> | Reference/Comment                                                                                                  |
|--------------------------------|---------------|---------------------------------|----------------------|----------------------------------|--------------------------------------------------------------------------------------------------------------------|
| <b>Alkenes</b>                 |               |                                 |                      |                                  |                                                                                                                    |
| Isoprene                       | C=C(C)C=C     | 1.0·10 <sup>9</sup>             |                      |                                  | (Raabe, 1996)                                                                                                      |
| <b>Monoalcohols</b>            |               |                                 |                      |                                  |                                                                                                                    |
| Methanol                       | CO            | 5.1·10 <sup>5</sup>             | 9.4·10 <sup>11</sup> | 4300                             | Average of (Exner et al., 1993 and {Rousse, 2004 #276)                                                             |
| Ethanol                        | CCO           | 2.2·10 <sup>6</sup>             | 1.4·10 <sup>11</sup> | 3300                             | (Herrmann and Zellner, 1998)                                                                                       |
| Propanol                       | CCCO          | 3.2·10 <sup>6</sup>             |                      |                                  | (Herrmann et al., 1994)                                                                                            |
| Butanol                        | CCCCO         | 1.9·10 <sup>6</sup>             |                      |                                  | (Shastri and Huie, 1990)                                                                                           |
| Pentanol                       | CCCCCO        | 2.4·10 <sup>6</sup>             |                      |                                  | (Shastri and Huie, 1990)                                                                                           |
| Hexanol                        | CCCCCCO       | 3.3·10 <sup>6</sup>             |                      |                                  | (Shastri and Huie, 1990)                                                                                           |
| Heptanol                       | CCCCCCCO      | 3.6·10 <sup>6</sup>             |                      |                                  | (Shastri and Huie, 1990)                                                                                           |
| Octanol                        | CCCCCCCCO     | 5.8·10 <sup>6</sup>             |                      |                                  | (Shastri and Huie, 1990)                                                                                           |
| Iso-propanol                   | CC(O)C        | 3.7·10 <sup>6</sup>             | 3.1·10 <sup>8</sup>  | 1323                             | (Herrmann et al., 1994) with E <sub>A</sub> /R of (Ito et al., 1989)                                               |
| Iso-butanol                    | CC(C)CO       | 1.6·10 <sup>6</sup>             |                      |                                  | (Shastri and Huie, 1990)                                                                                           |
| Tert-butanol                   | CC(C)CO       | 6.6·10 <sup>4</sup>             |                      |                                  | (Herrmann et al., 1994)                                                                                            |
| Allyl alcohol                  | C=CCO         | 2.2·10 <sup>8</sup>             |                      |                                  | Average of (Alfassi et al., 1993) and (Ito et al., 1989)                                                           |
| 2-Butenol                      | CC=CCO        | 2.1·10 <sup>9</sup>             |                      |                                  | (Alfassi et al., 1993)                                                                                             |
| 3-Methyl 3-Buten-1-ol          | C=C(C)CCO     | 2.4·10 <sup>9</sup>             |                      |                                  | (Alfassi et al., 1993)                                                                                             |
| <b>Diols and polyols</b>       |               |                                 |                      |                                  |                                                                                                                    |
| Ethylene glycol                | OCCO          | 6.6·10 <sup>6</sup>             | 7.1·10 <sup>9</sup>  | 2117                             | (Hoffmann et al., 2009)                                                                                            |
| 1,2-Propanediol                | CC(O)CO       | 9.9·10 <sup>6</sup>             | 6.8·10 <sup>10</sup> | 2622                             | (Hoffmann et al., 2009)                                                                                            |
| Glycerol                       | OCC(O)CO      | 1.3·10 <sup>7</sup>             | 1.4·10 <sup>12</sup> | 3452                             | (Hoffmann et al., 2009)                                                                                            |
| <b>Aldehydes and gem-diols</b> |               |                                 |                      |                                  |                                                                                                                    |
| Formaldehyde                   | C=O           | 3.5·10 <sup>6</sup>             | 3.4·10 <sup>6</sup>  | 674                              | Average of (Ito et al., 1989) <sup>1</sup> and (Wayne et al., 1991) with E <sub>A</sub> /R of (Wayne et al., 1991) |
| Hydrated formaldehyde          | OCO           | 1.0·10 <sup>6</sup>             | 3.6·10 <sup>12</sup> | 4500                             | (Exner et al., 1993)                                                                                               |
| Acetaldehyde                   | CC=O          | 1.9·10 <sup>6</sup>             |                      |                                  | (Zellner et al., 1996)                                                                                             |
| Hydrated acetaldehyde          | CC(O)O        | 2.0·10 <sup>6</sup>             |                      |                                  | Average of (Zellner et al., 1996) <sup>3</sup> and (Rousse and George, 2004)                                       |
| Propionaldehyde                | CCC=O         | 5.8·10 <sup>7</sup>             | 3.2·10 <sup>11</sup> | 2646                             | (de Semainville et al., 2007)                                                                                      |
| Butyraldehyde                  | CCCC=O        | 5.6·10 <sup>7</sup>             | 4.9·10 <sup>10</sup> | 2045                             | (de Semainville et al., 2007)                                                                                      |
| Iso-butyraldehyde              | CC(C)C=O      | 6.3·10 <sup>7</sup>             | 3.7·10 <sup>8</sup>  | 529                              | (Wayne et al., 1991)                                                                                               |
| 2,2-Dimethyl propanal          | CC(C)(C)C=O   | 7.0·10 <sup>7</sup>             | 3.8·10 <sup>8</sup>  | 505                              | (Wayne et al., 1991)                                                                                               |
| Methacrolein                   | C=C(C)C=O     | 4.0·10 <sup>7</sup>             | 5.8·10 <sup>8</sup>  | 842                              | (Schöne et al., 2014)                                                                                              |
| Methyl vinyl ketone            |               | 9.7·10 <sup>6</sup>             | 6.2·10 <sup>8</sup>  | 1203                             | (Schöne et al., 2014)                                                                                              |
| Glyoxal                        | O=CC=O        | 4.5·10 <sup>6</sup>             | 6.2·10 <sup>12</sup> | 9897                             | (Schaefer et al., 2015)                                                                                            |
| Hydrated glyoxal               | OC(O)C(O)O    | 1.1·10 <sup>6</sup>             | 8.9·10 <sup>10</sup> | 3368                             | (Raabe, 1996)                                                                                                      |
| <b>Ketones</b>                 |               |                                 |                      |                                  |                                                                                                                    |
| Acetone                        | CC(=O)C       | 3.7·10 <sup>3</sup>             | 7.6·10 <sup>9</sup>  | 4330                             | (Herrmann and Zellner, 1998)                                                                                       |
| Hydroxy acetone                | CC(=O)CO      | 1.8·10 <sup>7</sup>             | 4.0·10 <sup>9</sup>  | 1564                             | (de Semainville et al., 2007)                                                                                      |

| Compound                    | SMILES string           | $k_{298}^{(a)}$   | $A^{(a)}$           | $E_A/R^{(b)}$ | Reference/Comment                                                                                              |
|-----------------------------|-------------------------|-------------------|---------------------|---------------|----------------------------------------------------------------------------------------------------------------|
| Methyl ethyl ketone         | CC(=O)CC                | $9.7 \cdot 10^6$  | $6.2 \cdot 10^8$    | 1200          | (de Semainville et al., 2007)                                                                                  |
| <b>Monocarboxylic acids</b> |                         |                   |                     |               |                                                                                                                |
| Formic acid                 | C(=O)O                  | $3.8 \cdot 10^5$  | $3.4 \cdot 10^{10}$ | 3400          | (Exner et al., 1994)                                                                                           |
| Formate                     | C(=O)[O-]               | $5.1 \cdot 10^7$  | $8.2 \cdot 10^{10}$ | 2200          | (Exner et al., 1994)                                                                                           |
| Acetic acid                 | CC(=O)O                 | $1.3 \cdot 10^4$  | $4.9 \cdot 10^9$    | 3800          | (Exner et al., 1994)                                                                                           |
| Acetate                     | CC(=O)[O-]              | $2.9 \cdot 10^6$  | $1.0 \cdot 10^{12}$ | 3800          | (Exner et al., 1994)                                                                                           |
| Propionic acid              | CCC(=O)O                | $7.7 \cdot 10^4$  |                     |               | (Rousse and George, 2004)                                                                                      |
| Crotonic acid               | CC=CC(=O)O              | $5.1 \cdot 10^7$  |                     |               | (Neta and Huie, 1986)                                                                                          |
| Glycolic acid               | OCC(=O)O                | $9.1 \cdot 10^5$  | $4.5 \cdot 10^{11}$ | 3969          | (de Semainville et al., 2007)                                                                                  |
| Glycolate                   | OCC(=O)[O-]             | $1.0 \cdot 10^7$  | $1.8 \cdot 10^{11}$ | 3007          | (de Semainville et al., 2007)                                                                                  |
| Lactic acid                 | CC(O)C(=O)O             | $2.1 \cdot 10^6$  | $1.0 \cdot 10^{11}$ | 3248          | (de Semainville et al., 2007)                                                                                  |
| Lactate                     | CC(O)C(=O)[O-]          | $1.0 \cdot 10^7$  | $8.3 \cdot 10^{10}$ | 2646          | (de Semainville et al., 2007)                                                                                  |
| Pyruvic acid                | CC(=O)C(=O)O            | $2.4 \cdot 10^6$  | $8.8 \cdot 10^8$    | 1804          | (de Semainville et al., 2007)                                                                                  |
| Pyruvate                    | CC(=O)C(=O)[O-]         | $1.9 \cdot 10^7$  | $3.7 \cdot 10^{11}$ | 2887          | (de Semainville et al., 2007)                                                                                  |
| Acrylic acid                | C=CC(=O)O               | $6.9 \cdot 10^6$  | $2.2 \cdot 10^{13}$ | 4450          | (Schöne et al., 2014)                                                                                          |
| Acrylate                    | C=CC(=O)[O-]            | $4.4 \cdot 10^7$  | $2.2 \cdot 10^9$    | 1200          | (Schöne et al., 2014)                                                                                          |
| Methacrylic acid            | C=C(C)C(=O)O            | $9.2 \cdot 10^7$  |                     |               | (Schöne et al., 2014)                                                                                          |
| Methacrylate                | C=C(C)C(=O)[O-]         | $1.7 \cdot 10^8$  |                     |               | (Schöne et al., 2014)                                                                                          |
| <b>Dicarboxylic acids</b>   |                         |                   |                     |               |                                                                                                                |
| Oxalic acid                 | OC(=O)C(=O)O            | $2.4 \cdot 10^4$  |                     |               | (Yang et al., 2004)                                                                                            |
| Oxalate monoanion           | OC(=O)C(=O)[O-]         | $6.1 \cdot 10^7$  | $8.4 \cdot 10^9$    | -2180         | Average of (Yang et al., 2004) and (de Semainville et al., 2010) with $E_A/R$ of (Raabe, 1996)                 |
| Oxalate dianion             | [O-]C(=O)C(=O)[O-]      | $2.2 \cdot 10^8$  | $2.2 \cdot 10^{12}$ | 2766          | Average of (Yang et al., 2004) and (de Semainville et al., 2010) with $E_A/R$ of (de Semainville et al., 2010) |
| Malonic acid                | OC(=O)CC(=O)O           | $5.1 \cdot 10^4$  |                     |               | (de Semainville et al., 2010)                                                                                  |
| Malonate monoanion          | OC(=O)CC(=O)[O-]        | $5.6 \cdot 10^6$  | $5.0 \cdot 10^{11}$ | 3368          | (de Semainville et al., 2010)                                                                                  |
| Malonate dianion            | [O-]C(=O)CC(=O)[O-]     | $2.3 \cdot 10^7$  | $6.3 \cdot 10^{11}$ | 3007          | (de Semainville et al., 2010)                                                                                  |
| Succinic acid               | OC(=O)CCC(=O)O          | $5.0 \cdot 10^3$  |                     |               | (de Semainville et al., 2010)                                                                                  |
| Succinate monoanion         | OC(=O)CCC(=O)[O-]       | $1.1 \cdot 10^7$  |                     |               | (de Semainville et al., 2010)                                                                                  |
| Succinate dianion           | [O-]C(=O)CCC(=O)[O-]    | $1.8 \cdot 10^7$  | $6.2 \cdot 10^{11}$ | 3127          | (de Semainville et al., 2010)                                                                                  |
| Mesoxalic acid              | OC(=O)C(=O)C(=O)O       | $1.7 \cdot 10^6$  | $5.1 \cdot 10^8$    | 1564          | (de Semainville et al., 2010)                                                                                  |
| Mesoxalate monoanion        | OC(=O)C(=O)C(=O)[O-]    | $2.3 \cdot 10^7$  |                     |               | (de Semainville et al., 2010)                                                                                  |
| Mesoxalate dianion          | [O-]C(=O)C(=O)C(=O)[O-] | $4.9 \cdot 10^7$  | $1.4 \cdot 10^{12}$ | 3127          | (de Semainville et al., 2010)                                                                                  |
| Fumaric acid                | OC(=O)/C=C/C(=O)O       | $<1.0 \cdot 10^6$ |                     |               | (Neta et al., 1988)                                                                                            |
| <b>Ethers and esters</b>    |                         |                   |                     |               |                                                                                                                |
| Methyl tert-butyl ether     | CC(C)(C)OC              | $3.9 \cdot 10^5$  |                     |               | (Rousse and George, 2004)                                                                                      |
| Methyl formate              | COC=O                   | $3.5 \cdot 10^6$  |                     |               | (Buxton et al., 2001) <sup>6</sup>                                                                             |
| Ethyl formate               | CCOC=O                  | $4.7 \cdot 10^6$  |                     |               | (Buxton et al., 2001)                                                                                          |
| Methyl acetate              | CC(O)OC                 | $<10^4$           |                     |               | (Buxton et al., 2001)                                                                                          |
| Ethyl acetate               | CC(=O)OCC               | $<10^4$           |                     |               | (Buxton et al., 2001)                                                                                          |
| Dimethyl malonate           | COC(=O)CC(=O)OC         | $2.6 \cdot 10^4$  |                     |               | (Rousse and George, 2004)                                                                                      |
| Dimethyl succinate          | COC(=O)CCC(=O)OC        | $3.4 \cdot 10^4$  |                     |               | (Rousse and George, 2004)                                                                                      |
| Dimethyl carbonate          | COC(=O)OC               | $8.4 \cdot 10^4$  |                     |               | (Rousse and George, 2004)                                                                                      |

| Compound          | SMILES string        | $k_{298}^{(a)}$  | $A^{(a)}$           | $E_A / R^{(b)}$ | Reference/Comment         |
|-------------------|----------------------|------------------|---------------------|-----------------|---------------------------|
| Diethyl carbonate | CCOC(=O)OCC          | $1.5 \cdot 10^4$ |                     |                 | (Rousse and George, 2004) |
| <b>Sugars</b>     |                      |                  |                     |                 |                           |
| Erythritol        | OCC(O)C(O)CO         | $1.4 \cdot 10^7$ | $3.4 \cdot 10^{10}$ | 2321            | (Hoffmann et al., 2009)   |
| Arabitol          | OCC(O)C(O)C(O)CO     | $1.5 \cdot 10^7$ | $1.1 \cdot 10^{10}$ | 1997            | (Hoffmann et al., 2009)   |
| Mannitol          | OCC(O)C(O)C(O)C(O)CO | $1.4 \cdot 10^7$ | $5.1 \cdot 10^{10}$ | 2466            | (Hoffmann et al., 2009)   |
| Levoglucozan      | OC1C(O)C(O)C2OC1OC2  | $1.6 \cdot 10^7$ | $2.3 \cdot 10^{10}$ | 2150            | (Hoffmann et al., 2010)   |

<sup>(a)</sup> in  $M^{-1} s^{-1}$ ; <sup>(b)</sup> in K  
<sup>1</sup>as given in (Wayne et al., 1991); <sup>2</sup>as given in (Toyota et al., 2004); <sup>3</sup>as given in CAPRAM database available at <http://projects.tropos.de/capram/>; <sup>4</sup>as given in NIST database (Ross et al., 1998); <sup>5</sup>as given in (de Semainville et al., 2007); <sup>6</sup> as given in (Herrmann, 2003)

**Table S3.** Correlation of OH and NO<sub>3</sub> rate expressions and statistical analysis data calculated from kinetic data of hydroxyl radical and nitrate radical of the reactions with organic compounds for the various compound classes. Kinetic data are based on the CAPRAM4.0 database (Bräuer et al., 2016) and recent data presented in the review of (Herrmann et al., 2015).

| Compound class       | A     | B      | R <sup>2</sup> | N  |
|----------------------|-------|--------|----------------|----|
| Alcohols             | 1.283 | -5.935 | 0.741          | 11 |
| Di- and polyols      | 4.603 | -35.44 | 0.859          | 10 |
| Carbonyl compounds   | 1.097 | -3.179 | 0.372          | 11 |
| Monocarboxylic acids | 1.151 | -3.584 | 0.642          | 14 |
| Dicarboxylic acids   | 0.701 | 0.848  | 0.161          | 13 |
| Overall              | 0.599 | 1.247  | 0.205          | 59 |

Notes: Parameters of the regression equations  $\log(k_{\text{NO}_3} = \text{M}^{-1}\text{s}^{-1}) = A \cdot \log(k_{\text{OH}} = \text{M}^{-1}\text{s}^{-1}) + B$ . N = Number of molecules in the regression.

**Table S4.** Summary of studies (offline methods) reporting the compounds originating from the reactions of BVOC and NO<sub>3</sub> in ambient samples

| Location                              | Sample            | Reported as                                        | Technique                       | Reference                      |
|---------------------------------------|-------------------|----------------------------------------------------|---------------------------------|--------------------------------|
| <i>Europe</i>                         |                   |                                                    |                                 |                                |
| Waldstein, Germany                    | PM <sub>2.5</sub> | Monoterpene OS and NOS                             | HPLC/(-)ESI-TOFMS               | (Inuma et al., 2007)           |
| K-Pusztá, Hungary                     | PM <sub>1.5</sub> | CHOS and CHONS compounds                           | Direct infusion (-)ESI-FTICR-MS | (Schmitt-Kopplin et al., 2010) |
| Silkeborg, Denmark                    | PM <sub>1</sub>   | Monoterpene OS and NOS                             | HPLC/(-)ESI-TOFMS               | (Kristensen and Glasius, 2011) |
| Brasschaat, Belgium                   | PM <sub>2.5</sub> | Monoterpene OS and NOS                             | HPLC/(-)ESI-Ion Trap MS         | (Gómez-González et al., 2012)  |
| Hamme, Belgium                        | PM <sub>10</sub>  | Monoterpene OS and NOS                             | HPLC/(-)ESI-Ion Trap MS         | (Kahnt et al., 2013)           |
| Hyytiälä, Finland                     | PM <sub>1</sub>   | Monoterpene OS and NOS                             | HPLC/(-)ESI-Orbitrap MS         | (Kourtchev et al., 2013)       |
| Greenland and Svalbard, Arctic region | PM <sub>10</sub>  | Monoterpene OS and NOS                             | HPLC/(-)ESI-TOFMS               | (Hansen et al., 2014)          |
| Copenhagen, Denmark                   | PM <sub>1</sub>   | Monoterpene OS and NOS                             | HPLC/(-)ESI-TOFMS               | (Nguyen et al., 2014)          |
| Cork, Ireland                         | PM <sub>1</sub>   | Monoterpene OS and NOS                             | HPLC/(-)ESI-Orbitrap MS         | (Kourtchev et al., 2014)       |
| <i>North America</i>                  |                   |                                                    |                                 |                                |
| Riverside, California, USA            | PM <sub>2.5</sub> | (Monoterpene) OS and NOS <sup>a</sup>              | Direct infusion (-)ESI-FTICR-MS | (Reemtsma et al., 2006)        |
| Southeastern USA                      | PM <sub>2.5</sub> | Monoterpene OS and NOS                             | HPLC/(-)ESI-Ion Trap MS         | (Gao et al., 2006)             |
| Southeastern USA                      | PM <sub>2.5</sub> | (Isoprene) and monoterpene OS and NOS <sup>a</sup> | UPLC/(-)ESI-TOFMS               | (Surratt et al., 2008)         |
| New Jersey, USA                       | Rainwater         | Monoterpene OS and NOS <sup>b</sup>                | Direct infusion (-)ESI-FTICR-MS | (Altieri et al., 2009a, b)     |
| Fresno, California, USA               | Fog               | (Monoterpene) OS and NOS <sup>b</sup>              | Direct infusion (-)ESI-FTICR-MS | (Mazzoleni et al., 2010)       |
| Steamboat Springs,                    | PM                | CHOS and CHONS                                     | Direct infusion ESI-            | (Mazzoleni et al.,             |

|                                              |                                                |                              |                                            |                              |
|----------------------------------------------|------------------------------------------------|------------------------------|--------------------------------------------|------------------------------|
| Colorado, USA                                |                                                | compounds                    | FTICR-MS                                   | 2012)                        |
| Steamboat Springs, Colorado, USA             | Cloud water                                    | CHOS and CHONS compounds     | Direct infusion ESI-FTICR-MS               | (Zhao et al., 2013)          |
| Toronto, Canada                              | Rainwater                                      | CHOS and CHONS compounds     | Direct infusion ESI-FTICR-MS               | (Cottrell et al., 2013)      |
| Bakersfield, California, USA                 | PM <sub>10</sub> (MOUDI) and PM <sub>2.5</sub> | Monoterpene OS and NOS       | Nano DESI-Orbitrap MS<br>UPLC/(-)ESI-TOFMS | (O'Brien et al., 2014)       |
| Los Angeles, USA                             | 0.32-0.56 µm PM                                | CHOS compounds               | Nano DESI-Orbitrap MS                      | (Tao et al., 2014)           |
| North Atlantic Ocean                         | TSP (WSOC) <sup>c</sup>                        | CHOS and CHONS compounds     | Direct infusion (-)ESI-FTICR-MS            | (Wozniak et al., 2014)       |
| North Atlantic Ocean                         | TSP (WISOC) <sup>d</sup>                       | CHOS and CHONS compounds     | Direct infusion (-)ESI-FTICR-MS            | (Willoughby et al., 2014)    |
| North Carolina, USA                          | Rainwater                                      | CHOS compounds               | Direct infusion (-)ESI-FTICR-MS            | (Mead et al., 2015)          |
| Pico Mountain, Vermont, USA                  | Free tropospheric PM <sub>2.5</sub>            | CHOS compounds               | Direct infusion (-)ESI-FTICR-MS            | (Dzepina et al., 2015)       |
|                                              |                                                |                              |                                            |                              |
| <i>Asia</i>                                  |                                                |                              |                                            |                              |
| Beijing, China                               | PM <sub>10</sub> (Berner)                      | Monoterpene NOS              | HPLC/(-)ESI-TOFMS                          | (van Pinxteren et al., 2009) |
| Pearl River Delta, China                     | PM <sub>2.5</sub>                              | CHOS and CHONS compounds     | Direct infusion (-)ESI-Orbitrap MS         | (Lin et al., 2012)           |
| Pearl River Delta, China                     | PM <sub>2.5</sub>                              | CHOS and CHONS compounds     | Direct infusion (-) or (+)ESI-Orbitrap MS  | (Lin et al., 2012a)          |
| Taiwan                                       | PM <sub>2.5</sub>                              | CHOS and CHONS compounds     | Direct infusion (-)ESI-Orbitrap MS         | (Lin et al., 2012b)          |
| Pearl River Delta, China                     | PM <sub>2.5</sub>                              | Isoprene and monoterpene NOS | HPLC/(-)ESI-QqQMS                          | (He et al., 2014)            |
| Shanghai, China                              | 0.4-0.7 µm PM                                  | CHOS compounds               | Nano DESI-Orbitrap MS                      | (Tao et al., 2014)           |
| Three mega cities along Yangtze River, China | PM <sub>2.5</sub>                              | Monoterpene OS and NOS       | UHPLC/(-)ESI-Orbitrap MS                   | (Wang et al., 2015)          |
|                                              |                                                |                              |                                            |                              |
| <i>Oceania</i>                               |                                                |                              |                                            |                              |

|                         |                  |                 |                                        |                       |
|-------------------------|------------------|-----------------|----------------------------------------|-----------------------|
| Melbourne,<br>Australia | PM <sub>10</sub> | Monoterpene NOS | HPLC/(-)ESI-TOFMS<br>UPLC/(-)ESI-TOFMS | (Iinuma et al., 2016) |
|-------------------------|------------------|-----------------|----------------------------------------|-----------------------|

<sup>a</sup>: isoprene OS and NOS were not attributed to the products originating from nitrate radical reactions

<sup>b</sup>: reported as chemical formulas that correspond to OS and NOS reported in Surratt et al., (2008)

<sup>c</sup>: Water Soluble Organic Carbon

<sup>d</sup>: Water Insoluble Organic Carbon



**Table S5** Campaign average mass concentrations for submicrometer Organics (Org),  $\text{NO}_{3,\text{meas}}$ ,  $\text{NO}_{3,\text{org}}$ ,  $\text{NO}_{3,\text{inorg}}$ , Organic Nitrate Aerosols (ON), and ON/Org ratio. See references for measurement details.

| Sample Site             | Sample Period                      | Organics, Org<br>( $\mu\text{g m}^{-3}$ ) <sup>a</sup> | $\text{NO}_{3,\text{meas}}$<br>( $\mu\text{g m}^{-3}$ ) <sup>c</sup> | $\text{NO}_{3,\text{org}}$<br>( $\mu\text{g m}^{-3}$ ) | $\text{NO}_{3,\text{inorg}}$<br>( $\mu\text{g m}^{-3}$ ) <sup>d</sup> | Organic Nitrate<br>Aerosols, ON<br>( $\mu\text{g m}^{-3}$ ) | ON/Org<br>ratio | Reference/Notes                                                                                                                                                                                                                                                                                                                                                                                                                                                                                                                                                                                                                                                           |
|-------------------------|------------------------------------|--------------------------------------------------------|----------------------------------------------------------------------|--------------------------------------------------------|-----------------------------------------------------------------------|-------------------------------------------------------------|-----------------|---------------------------------------------------------------------------------------------------------------------------------------------------------------------------------------------------------------------------------------------------------------------------------------------------------------------------------------------------------------------------------------------------------------------------------------------------------------------------------------------------------------------------------------------------------------------------------------------------------------------------------------------------------------------------|
| Bakersfield, CA,<br>USA | 15 May -<br>29 June, 2010          | 3.38                                                   | 0.58                                                                 | 0.16                                                   | 0.42                                                                  | 0.79                                                        | 0.23            | <ul style="list-style-type: none"> <li>• Rollins et al. (2012; 2013)</li> <li>• <math>\text{NO}_{3,\text{org}}</math> measured by TD-LIF</li> <li>• Assume MW of organic nitrate = 300 g/mol when converting <math>\text{NO}_{3,\text{org}}</math> to ON</li> <li>• ON corresponds to the sum of the mass of both the org portion and nitrate portion of organic nitrates</li> <li>• ON/OA = 0.17 when <math>\text{NO}_{3,\text{org}}</math> measured by FTIR is used</li> </ul>                                                                                                                                                                                          |
| San Diego, CA,<br>USA   | 23 February -<br>30 March,<br>2009 | 1.60 <sup>b</sup>                                      | 0.69                                                                 | 0.05                                                   | 0.64                                                                  | 0.17                                                        | 0.11            | <ul style="list-style-type: none"> <li>• Day et al. (2010) Table 2</li> <li>• <math>\text{NO}_{3,\text{org}}</math> measured by FTIR and the value shown in this table is calculated by scaling by 62/68 to obtain -ONO<sub>2</sub> mass since FTIR is reported as 0.5C + -ONO<sub>2</sub></li> <li>• Assume MW of organic nitrate = 230 g/mol when converting <math>\text{NO}_{3,\text{org}}</math> to ON</li> <li>• ON corresponds to the sum of the mass of both the org portion and nitrate portion of organic nitrates</li> <li>• ON/OA ratio is calculated by scaling the organic nitrate functional group to OM measured by FTIR, 3.2% x (230/68) = 11%</li> </ul> |

|                                           |                                     |       |      |      |                      |      |      |                                                                                                                                                                                                                                                                                                                                                                                                                                                                                                                                                                                                                                                                                                                              |
|-------------------------------------------|-------------------------------------|-------|------|------|----------------------|------|------|------------------------------------------------------------------------------------------------------------------------------------------------------------------------------------------------------------------------------------------------------------------------------------------------------------------------------------------------------------------------------------------------------------------------------------------------------------------------------------------------------------------------------------------------------------------------------------------------------------------------------------------------------------------------------------------------------------------------------|
| Woodland Park,<br>CO, USA                 | July - August,<br>2011              | 1.86  | 0.07 | 0.06 | 0.01                 | 0.16 | 0.09 | <ul style="list-style-type: none"> <li>• Fry et al. (2013)</li> <li>• Use <math>\text{NO}_2^+/\text{NO}^+</math> method (<math>R_{\text{ON}} = 0.13</math>) to obtain <math>\text{NO}_{3,\text{org}}</math></li> <li>• Assume MW of organic nitrate = 230 g/mol when converting <math>\text{NO}_{3,\text{org}}</math> to ON</li> <li>• ON corresponds to the mass of the org portion of organic nitrates</li> </ul>                                                                                                                                                                                                                                                                                                          |
| Atlanta<br>(Jefferson Street),<br>GA, USA | 10 May -<br>2 June, 2012            | 9.10  | 0.36 | 0.27 | 0.09                 | 1.31 | 0.14 |                                                                                                                                                                                                                                                                                                                                                                                                                                                                                                                                                                                                                                                                                                                              |
|                                           | 6 November -<br>4 December,<br>2012 | 7.90  | 1.18 | 0.25 | 0.93                 | 1.19 | 0.15 | <ul style="list-style-type: none"> <li>• Xu et al. (2015b) Tables 1 and 2</li> <li>• Combine PMF method and <math>\text{NO}^+/\text{NO}_2^+</math> method (<math>R_{\text{ON}} = 5</math> and 10) to obtain upper bound for <math>\text{NO}_{3,\text{org}}</math>; thus the <math>\text{NO}_{3,\text{inorg}}</math> values in the table are lower bound values</li> <li>• Assume MW of organic nitrate = 300 g/mol when converting <math>\text{NO}_{3,\text{org}}</math> to ON</li> <li>• ON corresponds to the sum of the mass of both the org portion and nitrate portion of organic nitrates</li> <li>• Data also available from Georgia Tech site and Roadside site, see Xu et al. (2015a; 2015b) for details</li> </ul> |
| Yorkville,<br>GA, USA                     | 26 June -<br>20 July, 2012          | 11.20 | 0.28 | 0.28 | 0.00                 | 1.35 | 0.12 |                                                                                                                                                                                                                                                                                                                                                                                                                                                                                                                                                                                                                                                                                                                              |
|                                           | 5 December -<br>20 January,<br>2013 | 3.20  | 0.76 | 0.16 | 0.60                 | 0.77 | 0.25 |                                                                                                                                                                                                                                                                                                                                                                                                                                                                                                                                                                                                                                                                                                                              |
| Centreville,<br>AL, USA                   | 24 June -<br>15 July, 2013          | 3.63  | 0.08 | 0.08 | 0.00 <sup>e, f</sup> | 0.39 | 0.10 |                                                                                                                                                                                                                                                                                                                                                                                                                                                                                                                                                                                                                                                                                                                              |
| Barcelona,<br>Spain                       | March, 2009                         | 8.10  | 3.65 | 0.48 | 3.17                 | 1.07 | 0.13 | <ul style="list-style-type: none"> <li>• Kiendler-Scharr et al. (2016) Table S2</li> <li>• Use <math>\text{NO}_2^+/\text{NO}^+</math> method (<math>R_{\text{ON}} = 0.1</math>) to obtain <math>\text{NO}_{3,\text{org}}</math></li> <li>• Assume MW of organic nitrate = 200 g/mol when converting <math>\text{NO}_{3,\text{org}}</math> to ON</li> <li>• ON corresponds to the mass of the org portion</li> </ul>                                                                                                                                                                                                                                                                                                          |
| Cabauw,<br>Netherlands                    | March, 2009                         | 1.26  | 2.51 | 0.38 | 2.13                 | 0.84 | 0.67 |                                                                                                                                                                                                                                                                                                                                                                                                                                                                                                                                                                                                                                                                                                                              |
| Finokalia,<br>Greece                      | March, 2009                         | 1.41  | 0.05 | 0.03 | 0.02                 | 0.07 | 0.05 |                                                                                                                                                                                                                                                                                                                                                                                                                                                                                                                                                                                                                                                                                                                              |

|                                |                  |      |      |      |      |      |      |                                                                                                                              |
|--------------------------------|------------------|------|------|------|------|------|------|------------------------------------------------------------------------------------------------------------------------------|
| Jungfrauoch,<br>Switzerland    | May, 2008        | 0.70 | 0.31 | 0.03 | 0.28 | 0.06 | 0.08 | of organic nitrates<br>• Data also available for May, 2008 for selected sites, see Kiendler-Scharr et al. (2016) for details |
| Melpitz,<br>Germany            | March, 2009      | 2.10 | 3.68 | 0.69 | 2.99 | 1.54 | 0.73 |                                                                                                                              |
|                                | October,<br>2008 | 3.88 | 2.98 | 0.74 | 2.24 | 1.65 | 0.43 |                                                                                                                              |
| Payerne,<br>Switzerland        | March, 2009      | 4.05 | 3.89 | 0.71 | 3.19 | 1.57 | 0.39 |                                                                                                                              |
|                                | October,<br>2008 | 5.36 | 2.72 | 0.20 | 2.52 | 0.44 | 0.08 |                                                                                                                              |
| Puijo,<br>Finland              | October,<br>2008 | 1.19 | 0.10 | 0.07 | 0.02 | 0.16 | 0.14 |                                                                                                                              |
| San Pietro<br>Capofiume, Italy | April, 2008      | 3.83 | 2.93 | 1.32 | 1.61 | 2.94 | 0.77 |                                                                                                                              |
| Vavihill,<br>Switzerland       | March, 2009      | 3.72 | 3.17 | 0.98 | 2.19 | 2.17 | 0.58 |                                                                                                                              |
|                                | October,<br>2008 | 2.46 | 1.66 | 0.75 | 0.92 | 1.66 | 0.67 |                                                                                                                              |
| Harwell, UK                    | October,<br>2008 | 3.19 | 3.15 | 0.90 | 2.25 | 2.00 | 0.63 |                                                                                                                              |
| Helsinki,<br>Finland           | March, 2009      | 2.92 | 0.94 | 0.14 | 0.79 | 0.32 | 0.11 |                                                                                                                              |
| Hyytiälä,<br>Finland           | March, 2009      | 1.36 | 0.23 | 0.09 | 0.14 | 0.20 | 0.15 |                                                                                                                              |
|                                | October,<br>2008 | 0.82 | 0.11 | 0.09 | 0.02 | 0.19 | 0.23 |                                                                                                                              |
| Kpuszta,<br>Hungary            | October,<br>2008 | 5.27 | 1.97 | 0.43 | 1.54 | 0.96 | 0.18 |                                                                                                                              |
| Mace Head,<br>Ireland          | March, 2009      | 1.06 | 0.58 | 0.22 | 0.36 | 0.49 | 0.47 |                                                                                                                              |
| Montseny,<br>Spain             | March, 2009      | 3.27 | 3.25 | 0.98 | 2.27 | 2.18 | 0.67 |                                                                                                                              |
| Puy de Dome,<br>France         | March, 2009      | 0.58 | 0.74 | 0.16 | 0.57 | 0.36 | 0.63 |                                                                                                                              |
|                                | October,<br>2008 | 1.77 | 0.82 | 0.23 | 0.58 | 0.52 | 0.29 |                                                                                                                              |

<sup>a</sup>Organics measured by aerosol mass spectrometer (AMS), except for San Diego data

<sup>b</sup>This value is OM measured by FTIR

<sup>c</sup>Nitrates (total nitrates) measured by aerosol mass spectrometer (AMS), corresponds to the mass of -ONO<sub>2</sub> functionality

<sup>d</sup>Calculated by ( $\text{NO}_{3,\text{meas}} - \text{NO}_{3,\text{org}}$ )

<sup>e</sup>Submicrometer  $\text{NO}_{3,\text{inorg}}$  was also measured by PILS to be  $0.04 \mu\text{g m}^{-3}$ , see Xu et al. (2015b) for details

<sup>f</sup> $\text{NO}_{3,\text{inorg}}$  in  $\text{PM}_{2.5}$  was measured by MARGA to be  $0.37 \mu\text{g m}^{-3}$  (stdev  $0.2 \mu\text{g m}^{-3}$ ), see Allen et al. (2015) for details

## References

- Alfassi, Z. B., Padmaja, S., Neta, P., and Huie, R. E.: Rate Constants for Reactions of NO<sub>3</sub> Radicals with Organic-Compounds in Water and Acetonitrile, *J Phys Chem-Us*, 97, 3780-3782, 1993.
- Allen, H. M., Draper, D. C., Ayres, B. R., Ault, A., Bondy, A., Takahama, S., Modini, R. L., Baumann, K., Edgerton, E., Knote, C., Laskin, A., Wang, B., and Fry, J. L.: Influence of crustal dust and sea spray supermicron particle concentrations and acidity on inorganic NO<sub>3</sub><sup>-</sup>; aerosol during the 2013 Southern Oxidant and Aerosol Study, *Atmos. Chem. Phys.*, 15, 10669-10685, 10.5194/acp-15-10669-2015, 2015.
- Altieri, K. E., Turpin, B. J., and Seitzinger, S. P.: Oligomers, organosulfates, and nitrooxy organosulfates in rainwater identified by ultra-high resolution electrospray ionization FT-ICR mass spectrometry, *Atmos Chem Phys*, 9, 2533-2542, 2009a.
- Altieri, K. E., Turpin, B. J., and Seitzinger, S. P.: Composition of Dissolved Organic Nitrogen in Continental Precipitation Investigated by Ultra-High Resolution FT-ICR Mass Spectrometry, *Environmental Science & Technology*, 43, 6950-6955, 10.1021/es9007849, 2009b.
- Atkinson, R., Aschmann, S. M., Winer, A. M., and Pitts, J. N.: Kinetics of the Gas-Phase Reactions of NO<sub>3</sub> Radicals with a Series of Dialkenes, Cycloalkenes, and Monoterpenes at 295 +/- 1-K, *Environmental Science & Technology*, 18, 370-375, 1984.
- Atkinson, R., Aschmann, S. M., Winer, A. M., and Pitts, J. N.: Kinetics and atmospheric implications of the gas-phase reactions of NO<sub>3</sub> radicals with a series of monoterpenes and related organics at 294 +/- 2-K, *Environmental Science & Technology*, 19, 159-163, 10.1021/es00132a009, 1985.
- Atkinson, R., Aschmann, S. M., and Pitts, J. N.: Rate constants for the gas-phase reactions of the nitrate radical with a series of organic compounds at 296 ± 2 K, *J Phys Chem A*, 92, 3454-3457, 1988.
- Atkinson, R., Aschmann, S. M., and Arey, J.: Rate constants for the gas-phase reactions of OH and NO<sub>3</sub> radicals and O<sub>3</sub> with sabinene and camphene at 296 ± 2 K, *Atmospheric Environment*, 24, 2647-2654, 1990.
- Atkinson, R., Arey, J., Aschmann, S. M., Corchnoy, S. B., and Shu, Y.: Rate constants for the gas-phase reactions of *cis*-3-Hexen-1-ol, *cis*-3-Hexenylacetate, *trans*-2-Hexenal, and Linalool with OH and NO<sub>3</sub> radicals and O<sub>3</sub> at 296 ± 2 K, and OH radical formation yields from the O<sub>3</sub> reactions, *Int J Chem Kinet*, 27, 941-955, 1995.
- Baker, J., Arey, J., and Atkinson, R.: Kinetics of the gas-phase reactions of OH radicals, NO<sub>3</sub> radicals and O<sub>3</sub> with three C<sub>7</sub> carbonyls formed from the atmospheric reactions of myrcene, ocimene and terpinolene, *J. Atmos. Chem.*, 48, 241-260, 2004.
- Barnes, I., Bastian, V., Becker, K. H., and Tong, Z.: Kinetics and Products of the Reactions of NO<sub>3</sub> with Monoalkenes, Dialkenes, and Monoterpenes, *J Phys Chem-Us*, 94, 2413-2419, 1990.
- Benter, T., and Schindler, R. N.: Absolute rate coefficients for the reaction of NO<sub>3</sub> radicals with simple dienes, *Chemical Physics Letters*, 145, 67-70, 10.1016/0009-2614(88)85134-0, 1988.
- Berndt, T., and Boge, O.: Gas-phase reaction of NO<sub>3</sub> radicals with isoprene: A kinetic and mechanistic study, *Int J Chem Kinet*, 29, 755-765, 1997.
- Bräuer, P., Mouchel-Vallon, C., Tilgner, A., Mutzel, A., Böge, O., Rodigast, M., Poulain, L., van Pinxteren, D., Aumont, B., and Herrmann, H.: Development of a protocol designed for the self-generation of explicit aqueous phase oxidation schemes of organic compounds, *Atmos. Chem. Phys. Discuss.*, in preparation, 2016.

- Buxton, G. V., Wang, J. Q., and Salmon, G. A.: Rate constants for the reactions of NO<sub>3</sub> center dot, SO<sub>4</sub> center dot- and Cl-center dot radicals with formate and acetate esters in aqueous solution, *Physical Chemistry Chemical Physics*, 3, 2618-2621, 2001.
- Cottrell, B. A., Gonsior, M., Isabelle, L. M., Luo, W., Perraud, V., McIntire, T. M., Pankow, J. F., Schmitt-Kopplin, P., Cooper, W. J., and Simpson, A. J.: A regional study of the seasonal variation in the molecular composition of rainwater, *Atmospheric Environment*, 77, 588-597, 10.1016/j.atmosenv.2013.05.027, 2013.
- Day, D. A., Liu, S., Russell, L. M., and Ziemann, P. J.: Organonitrate group concentrations in submicron particles with high nitrate and organic fractions in coastal southern California, *Atmospheric Environment*, 44, 1970-1979, 2010.
- de Semainville, P. G., Hoffmann, D., George, C., and Herrmann, H.: Study of nitrate radical (NO<sub>3</sub>) reactions with carbonyls and acids in aqueous solution as a function of temperature, *Physical Chemistry Chemical Physics*, 9, 958-968, 2007.
- de Semainville, P. G., Anna, B. D., and George, C.: Aqueous Phase Reactivity of Nitrate Radicals (NO<sub>3</sub>) Toward Dicarboxylic Acids, *Z Phys Chem*, 224, 1247-1260, 2010.
- Dzepina, K., Mazzoleni, C., Fialho, P., China, S., Zhang, B., Owen, R. C., Helmig, D., Hueber, J., Kumar, S., Perlinger, J. A., Kramer, L. J., Dziobak, M. P., Ampadu, M. T., Olsen, S., Wuebbles, D. J., and Mazzoleni, L. R.: Molecular characterization of free tropospheric aerosol collected at the Pico Mountain Observatory: a case study with a long-range transported biomass burning plume, *Atmos Chem Phys*, 15, 5047-5068, 10.5194/acp-15-5047-2015, 2015.
- Exner, M., Herrmann, H., Michel, J. W., and Zellner, R.: Laser pulse initiated measurements of NO<sub>3</sub> reactions with S(IV) and organic compounds in aqueous solutions, in: *Proceedings of EUROTRAC Symposium '92: Photo-oxi dants: Precursors and Products*, edited by: Borrell, P. M., Borrell, P., Cvitaš, T., and Seiler, W., SPB Academic Publishing, The Hague, NL, 615 – 618, 1993.
- Exner, M., Herrmann, H., and Zellner, R.: Rate Constants for the Reactions of the NO<sub>3</sub> Radical with HCOOH/HCOO<sup>-</sup> and CH<sub>3</sub>COOH/CH<sub>3</sub>COO<sup>-</sup> in Aqueous-Solution between 278-K and 328-K, *Journal of Atmospheric Chemistry*, 18, 359-378, 1994.
- Fry, J. L., Kiendler-Scharr, A., Rollins, A. W., Brauers, T., Brown, S. S., Dorn, H. P., Dubé, W. P., Fuchs, H., Mensah, A., Rohrer, F., Tillmann, R., Wahner, A., Wooldridge, P. J., and Cohen, R. C.: SOA from limonene: role of NO<sub>3</sub> in its generation and degradation, *Atmos. Chem. Phys.*, 11, 3879-3894, 2011.
- Fry, J. L., Draper, D. C., Zarzana, K. J., Campuzano-Jost, P., Day, D. A., Jimenez, J. L., Brown, S. S., Cohen, R. C., Kaser, L., Hansel, A., Cappellin, L., Karl, T., Hodzic Roux, A., Turnipseed, A., Cantrell, C., Lefer, B., and Grossberg, N.: Observations of gas- and aerosol-phase organic nitrates at BEACHON-RoMBAS 2011, *Atmos. Chem. Phys.*, 13, 8585-8605, 2013.
- Gao, S., Surratt, J. D., Knipping, E. M., Edgerton, E. S., Shahgholi, M., and Seinfeld, J. H.: Characterization of polar organic components in fine aerosols in the southeastern United States: Identity, origin, and evolution, *Journal of Geophysical Research: Atmospheres*, 111, n/a-n/a, 10.1029/2005JD006601, 2006.
- Gómez-González, Y., Wang, W., Vermeylen, R., Chi, X., Neiryck, J., Janssens, I. A., Maenhaut, W., and Claeys, M.: Chemical characterisation of atmospheric aerosols during a 2007 summer field campaign at Brasschaat, Belgium: sources and source processes of biogenic secondary organic aerosol, *Atmos Chem Phys*, 12, 125-138, 10.5194/Acp-12-125-2012, 2012.
- Gross, S., and Bertram, A. K.: Reactive uptake of NO<sub>3</sub>, N<sub>2</sub>O<sub>5</sub>, NO<sub>2</sub>, HNO<sub>3</sub>, and O<sub>3</sub> on three types of polycyclic aromatic hydrocarbon surfaces, *J. Phys. Chem. A*, 112, 3104-3113, 2008a.

- Gross, S., and Bertram, A. K.: Reactive Uptake of  $\text{NO}_3$ ,  $\text{N}_2\text{O}_5$ ,  $\text{NO}_2$ ,  $\text{HNO}_3$ , and  $\text{O}_3$  on Three Types of Polycyclic Aromatic Hydrocarbon Surfaces, *J. Phys. Chem. A*, 2008b.
- Gross, S., and Bertram, A. K.: Products and kinetics of the reaction of an alkane monolayer and a terminal alkene monolayer with  $\text{NO}_3$  radicals, *J. Geophys. Res.*, 114, D02307, doi:10.1029/2008JD010987, 2009.
- Gross, S., Iannone, R., Xiao, S., and Bertram, A. K.: Reactive uptake studies of  $\text{NO}_3$  and  $\text{N}_2\text{O}_5$  on alkenoic acid, alkanoate, and polyalcohol substrates to probe nighttime aerosol chemistry, *Physical Chemistry Chemical Physics*, 11, 7792-7803, 2009a.
- Gross, S., Iannone, R. Q., Xiao, S., and Bertram, A. K.: Reactive uptake studies of  $\text{NO}_3$  and  $\text{N}_2\text{O}_5$  on alkenoic acid, alkanoate and polyalcohol substrates to probe nighttime aerosol chemistry, *Phys. Chem. Chem. Phys.*, 11, 7792-7803, 2009b.
- Hansen, A. M. K., Kristensen, K., Nguyen, Q. T., Zare, A., Cozzi, F., Nojgaard, J. K., Skov, H., Brandt, J., Christensen, J. H., Strom, J., Tunved, P., Krejci, R., and Glasius, M.: Organosulfates and organic acids in Arctic aerosols: speciation, annual variation and concentration levels, *Atmos Chem Phys*, 14, 7807-7823, 10.5194/acp-14-7807-2014, 2014.
- Hanson, D. R., Ravishankara, A. R., and Solomon, S.: Heterogeneous reactions in sulfuric acid aerosols: A framework for model calculations, *J. Geophys. Res.*, 99, 3615-3629, 1994.
- He, Q.-F., Ding, X., Wang, X.-M., Yu, J.-Z., Fu, X.-X., Liu, T.-Y., Zhang, Z., Xue, J., Chen, D.-H., Zhong, L.-J., and Donahue, N. M.: Organosulfates from Pinene and Isoprene over the Pearl River Delta, South China: Seasonal Variation and Implication in Formation Mechanisms, *Environmental Science & Technology*, 10.1021/es501299v, 2014.
- Herrmann, H., Exner, M., and Zellner, R.: Reactivity Trends in Reactions of the Nitrate Radical ( $\text{NO}_3$ ) with Inorganic and Organic Cloudwater Constituents, *Geochim Cosmochim Acta*, 58, 3239-3244, 1994.
- Herrmann, H., and Zellner, R.: Reactions of  $\text{NO}_3$ -Radicals in Aqueous Solution, in: N-Centered Radicals, edited by: Alfassi, Z. B., Wiley, Chichester, 291-343, 1998.
- Herrmann, H.: Kinetics of aqueous phase reactions relevant for atmospheric chemistry, *Chemical Reviews*, 103, 4691-4716, 10.1021/cr020658q, 2003.
- Herrmann, H., Schaefer, T., Tilgner, A., Styler, S. A., Weller, C., Teich, M., and Otto, T.: Tropospheric Aqueous-Phase Chemistry: Kinetics, Mechanisms, and Its Coupling to a Changing Gas Phase, *Chemical Reviews*, 115, 4259-4334, 10.1021/cr500447k, 2015.
- Hoffmann, D., Weigert, B., Barzaghi, P., and Herrmann, H.: Reactivity of poly-alcohols towards OH,  $\text{NO}_3$  and  $\text{SO}_4^-$  in aqueous solution, *Physical Chemistry Chemical Physics*, 11, 9351-9363, 2009.
- Hoffmann, D., Tilgner, A., Iinuma, Y., and Herrmann, H.: Atmospheric Stability of Levoglucosan: A Detailed Laboratory and Modeling Study, *Environmental Science & Technology*, 44, 694-699, 10.1021/es902476f, 2010.
- Hung, H., -M., Katrib, Y., and Martin, S., T.: Products and Mechanisms of the Reaction of Oleic Acid with Ozone and Nitrate Radical, *The Journal of Physical Chemistry A*, 109, 4517-4530, 10.1021/jp0500900, 2005.
- Iannone, R., Xiao, S., and Bertram, A. K.: Potentially important nighttime heterogeneous chemistry:  $\text{NO}_3$  with aldehydes and  $\text{N}_2\text{O}_5$  with alcohols, *Physical Chemistry Chemical Physics*, 13, 10214-10223, 10.1039/C1CP20294D, 2011.
- Iinuma, Y., Müller, C., Berndt, T., Böge, O., Claeys, M., and Herrmann, H.: Evidence for the Existence of Organosulfates from b-Pinene Ozonolysis in Ambient Secondary Organic Aerosol, *Environ. Sci. Technol.*, 41, 6678-6683, <http://dx.doi.org/10.1021/es070938t>, 2007.

- Iinuma, Y., Keywood, M., and Herrmann, H.: Characterisation of primary and secondary organic aerosols in Melbourne airshed: The influence of biogenic emissions, wood smoke and bushfires, *Atmospheric Environment*, 54-63, 10.1016/j.atmosenv.2015.12.014, 2016.
- Ito, O., Akiho, S., and Iino, M.: Kinetics for Reactions of the Nitrate Radical ( $\text{NO}_3$ ) with Aldehydes in Acetonitrile, *J Phys Chem-Us*, 93, 4079-4083, 1989.
- Kahnt, A., Behrouzi, S., Vermeulen, R., Shalamzari, M. S., Vercauteren, J., Roekens, E., Claeys, M., and Maenhaut, W.: One-year study of nitro-organic compounds and their relation to wood burning in PM10 aerosol from a rural site in Belgium, *Atmospheric Environment*, 81, 561-568, 10.1016/J.Atmosenv.2013.09.041, 2013.
- Kaiser, J. C., Riemer, N., and Knopf, D. A.: Detailed heterogeneous oxidation of soot surfaces in a particle-resolved aerosol model, *Atmos. Chem. Phys.*, 11, 4505-4520, 10.5194/acp-11-4505-2011, 2011.
- Kiendler-Scharr, A., Mensah, A. A., Friese, E., Topping, D., Nemitz, E., Prevot, A. S. H., Äijälä, M., Allan, J., Canonaco, F., Canagaratna, M., Carbone, S., Crippa, M., Dall'Osto, M., Day, D. A., De Carlo, P., Di Marco, C. F., Elbern, H., Eriksson, A., Freney, E., Hao, L., Herrmann, H., Hildebrandt, L., Hillamo, R., Jimenez, J. L., Laaksonen, A., McFiggans, G., Mohr, C., O'Dowd, C., Otjes, R., Ovadnevaite, J., Pandis, S. N., Poulain, L., Schlag, P., Sellegri, K., Swietlicki, E., Tiitta, P., Vermeulen, A., Wahner, A., Worsnop, D., and Wu, H. C.: Organic nitrates from night-time chemistry are ubiquitous in the European submicron aerosol, *Geophys Res Lett*, n/a-n/a, 10.1002/2016GL069239, 2016.
- Knopf, D. A., Mak, J., Gross, S., and Bertram, A. K.: Does atmospheric processing of saturated hydrocarbon surfaces by  $\text{NO}_3$  lead to volatilization, *Geophys. Res. Lett.*, 33, L17816, doi:10.1029/2006GL026884, 2006.
- Knopf, D. A., Forrester, S. M., and Slade, J. H.: Heterogeneous oxidation kinetics of organic biomass burning aerosol surrogates by  $\text{O}_3$ ,  $\text{NO}_2$ ,  $\text{N}_2\text{O}_5$ , and  $\text{NO}_3$ , *Physical Chemistry Chemical Physics*, 13, 21050-21062, 2011.
- Kourtchev, I., Fuller, S., Aalto, J., Ruuskanen, T. M., McLeod, M. W., Maenhaut, W., Jones, R., Kulmala, M., and Kalberer, M.: Molecular Composition of Boreal Forest Aerosol from Hyytiälä, Finland, Using Ultrahigh Resolution Mass Spectrometry, *Environmental Science & Technology*, 47, 4069-4079, 10.1021/es3051636, 2013.
- Kourtchev, I., O'Connor, I. P., Giorio, C., Fuller, S. J., Kristensen, K., Maenhaut, W., Wenger, J. C., Sodeau, J. R., Glasius, M., and Kalberer, M.: Effects of anthropogenic emissions on the molecular composition of urban organic aerosols: An ultrahigh resolution mass spectrometry study, *Atmospheric Environment*, 89, 525-532, 10.1016/J.Atmosenv.2014.02.051, 2014.
- Kristensen, K., and Glasius, M.: Organosulfates and oxidation products from biogenic hydrocarbons in fine aerosols from a forest in North West Europe during spring, *Atmospheric Environment*, 45, 4546-4556, 10.1016/j.atmosenv.2011.05.063, 2011.
- Lee, L., Wooldridge, P., Nah, T., Wilson, K., and Cohen, R.: Observation of rates and products in the reaction of  $\text{NO}_3$  with submicron squalane and squalene aerosol, *Physical Chemistry Chemical Physics*, 15, 882-892, 10.1039/C2CP42500A, 2013.
- Lin, P., Rincon, A. G., Kalberer, M., and Yu, J. Z.: Elemental Composition of HULIS in the Pearl River Delta Region, China: Results Inferred from Positive and Negative Electrospray High Resolution Mass Spectrometric Data, *Environmental Science & Technology*, 46, 7454-7462, 10.1021/es300285d, 2012.
- Lu, J. W., Flores, J. M., Lavi, A., Abo-Riziq, A., and Rudich, Y.: Changes in the optical properties of benzo[a]pyrene-coated aerosols upon heterogeneous reactions with  $\text{NO}_2$



- and NO<sub>3</sub>, *Physical Chemistry Chemical Physics*, 13, 6484-6492, 10.1039/c0cp02114h, 2011.
- Mak, J., Gross, S., and Bertram, A. K.: Uptake of NO<sub>3</sub> on soot and pyrene surfaces, *Geophys. Res. Lett.*, 34, L10804  
10.1029/2006gl029756, 2007.
- Mazzoleni, L. R., Ehrmann, B. M., Shen, X. H., Marshall, A. G., and Collett, J. L.: Water-Soluble Atmospheric Organic Matter in Fog: Exact Masses and Chemical Formula Identification by Ultrahigh-Resolution Fourier Transform Ion Cyclotron Resonance Mass Spectrometry, *Environmental Science & Technology*, 44, 3690-3697, 10.1021/Es903409k, 2010.
- Mazzoleni, L. R., Saranjampour, P., Dalbec, M. M., Samburova, V., Hallar, A. G., Zielinska, B., Lowenthal, D. H., and Kohl, S.: Identification of water-soluble organic carbon in non-urban aerosols using ultrahigh-resolution FT-ICR mass spectrometry: organic anions, *Environmental Chemistry*, 9, 285-297, 10.1071/En11167, 2012.
- Mead, R. N., Felix, J. D., Avery, G. B., Kieber, R. J., Willey, J. D., and Podgorski, D. C.: Characterization of CHOS compounds in rainwater from continental and coastal storms by ultrahigh resolution mass spectrometry, *Atmospheric Environment*, 105, 162-168, 10.1016/j.atmosenv.2015.01.057, 2015.
- Moise, T., Talukdar, R. K., Frost, G. J., Fox, R. W., and Rudich, Y.: Reactive uptake of NO<sub>3</sub> by liquid and frozen organics, *J. Geophys. Res.*, 107, D24014, DOI:24010.21029/22001JD000334, 2002.
- Neta, P., and Huie, R. E.: Rate Constants for Reactions of NO<sub>3</sub> Radicals in Aqueous-Solutions, *J Phys Chem-Us*, 90, 4644-4648, 10.1021/J100410a035, 1986.
- Neta, P., Huie, R. E., and Ross, A. B.: Rate Constants for Reactions of Inorganic Radicals in Aqueous Solution, *Journal of Physical and Chemical Reference Data*, 17, 1027-1284, doi:<http://dx.doi.org/10.1063/1.555808>, 1988.
- Nguyen, Q. T., Christensen, M. K., Cozzi, F., Zare, A., Hansen, A. M. K., Kristensen, K., Tulinius, T. E., Madsen, H. H., Christensen, J. H., Brandt, J., Massling, A., Nojgaard, J. K., and Glasius, M.: Understanding the anthropogenic influence on formation of biogenic secondary organic aerosols in Denmark via analysis of organosulfates and related oxidation products, *Atmos Chem Phys*, 14, 8961-8981, 10.5194/acp-14-8961-2014, 2014.
- O'Brien, R. E., Laskin, A., Laskin, J., Rubitschun, C. L., Surratt, J. D., and Goldstein, A. H.: Molecular characterization of S- and N-containing organic constituents in ambient aerosols by negative ion mode high-resolution Nanospray Desorption Electrospray Ionization Mass Spectrometry: CalNex 2010 field study, *Journal of Geophysical Research: Atmospheres*, 119, 12,706-712,720, 10.1002/2014JD021955, 2014.
- Pfrang, C., Shiraiwa, M., and Pöschl, U.: Coupling aerosol surface and bulk chemistry with a kinetic double layer model (K2-SUB): oxidation of oleic acid by ozone, *Atmos. Chem. Phys.*, 10, 4537-4557, 10.5194/acp-10-4537-2010, 2010.
- Pitts, J. N., Jr., Bierman, H. W., Atkinson, R., and Winer, A. M.: Atmospheric implications of simultaneous measurements of NO<sub>3</sub> radicals and HONO, *Geophys. Res. Lett.*, 11, 557-560, 1984.
- Pöschl, U., Rudich, Y., and Ammann, M.: Kinetic model framework for aerosol and cloud surface chemistry and gas-particle interactions &ndash; Part 1: General equations, parameters, and terminology, *Atmos. Chem. Phys.*, 7, 5989-6023, 10.5194/acp-7-5989-2007, 2007.
- Raabe, G.: Eine laserphotolytische Studie zur Kinetik von Reaktionen des NO<sub>3</sub>-Radikals in wa□ssriger Lo□sung, University of Essen, 1996.

- Reemtsma, T., These, A., Venkatachari, P., Xia, X., Hopke, P. K., Springer, A., and Linscheid, M.: Identification of Fulvic Acids and Sulfated and Nitrated Analogues in Atmospheric Aerosol by Electrospray Ionization Fourier Transform Ion Cyclotron Resonance Mass Spectrometry, *Analytical Chemistry*, 78, 8299-8304, 10.1021/ac061320p, 2006.
- Renbaum-Wolff, L., Grayson, J. W., Bateman, A. P., Kuwata, M., Sellier, M., Murray, B. J., Shilling, J. E., Martin, S. T., and Bertram, A. K.: Viscosity of  $\alpha$ -pinene secondary organic material and implications for particle growth and reactivity, *Proceedings of the National Academy of Sciences*, 110, 8014-8019, 2013.
- Robinson, A. L., Donahue, N. M., and Rogge, W. F.: Photochemical oxidation and changes in molecular composition of organic aerosol in the regional context, *Journal of Geophysical Research: Atmospheres*, 111, n/a-n/a, 10.1029/2005JD006265, 2006.
- Roldin, P., Eriksson, A. C., Nordin, E. Z., Hermansson, E., Mogensen, D., Rusanen, A., Boy, M., Swietlicki, E., Svenningsson, B., Zelenyuk, A., and Pagels, J.: Modelling non-equilibrium secondary organic aerosol formation and evaporation with the aerosol dynamics, gas- and particle-phase chemistry kinetic multilayer model ADCHAM, *Atmos. Chem. Phys.*, 14, 7953-7993, 10.5194/acp-14-7953-2014, 2014.
- Rollins, A. W., Browne, E. C., Min, K. E., Pusede, S. E., Wooldridge, P. J., Gentner, D. R., Goldstein, A. H., Liu, S., Day, D. A., Russell, L. M., and Cohen, R. C.: Evidence for  $\text{NO}_x$  Control over Nighttime SOA Formation, *Science*, 337, 1210-1212, 2012.
- Rollins, A. W., Pusede, S., Wooldridge, P., Min, K. E., Gentner, D. R., Goldstein, A. H., Liu, S., Day, D. A., Russell, L. M., Rubitschun, C. L., Surratt, J. D., and Cohen, R. C.: Gas/particle partitioning of total alkyl nitrates observed with TD-LIF in Bakersfield, *Journal of Geophysical Research: Atmospheres*, 118, 6651-6662, 10.1002/jgrd.50522, 2013.
- Ross, A. B., Bielski, B. H. J., Buxton, G. V., Cabelli, D. E., Helman, W. P., Huie, R. E., Grodkovski, J., Neta, P., Mulazzani, Q. G., and Wilkinson, F.: NIST standard reference database 40: NDRL/NIST solution kinetics database vers. 3.0, 1998.
- Rousse, D., and George, C.: A novel long path photolysis cell-application to the reactivity of selected organic compounds toward the nitrate radical ( $\text{NO}_3$ ), *Physical Chemistry Chemical Physics*, 6, 3408-3414, 2004.
- Schaefer, T., van Pinxteren, D., and Herrmann, H.: Multiphase Chemistry of Glyoxal: Revised Kinetics of the Alkyl Radical Reaction with Molecular Oxygen and the Reaction of Glyoxal with OH,  $\text{NO}_3$ , and  $\text{SO}_4^-$  in Aqueous Solution, *Environmental Science & Technology*, 49, 343-350, 10.1021/es505860s, 2015.
- Schmitt-Kopplin, P., Gelencser, A., Dabek-Zlotorzynska, E., Kiss, G., Hertkorn, N., Harir, M., Hong, Y., and Gebefugi, I.: Analysis of the Unresolved Organic Fraction in Atmospheric Aerosols with Ultrahigh-Resolution Mass Spectrometry and Nuclear Magnetic Resonance Spectroscopy: Organosulfates As Photochemical Smog Constituents, *Analytical Chemistry*, 82, 8017-8026, 10.1021/ac101444r, 2010.
- Schöne, L., Schindelka, J., Szeremeta, E., Schaefer, T., Hoffmann, D., Rudzinski, K. J., Szmigielski, R., and Herrmann, H.: Atmospheric aqueous phase radical chemistry of the isoprene oxidation products methacrolein, methyl vinyl ketone, methacrylic acid and acrylic acid - kinetics and product studies, *Physical Chemistry Chemical Physics*, 16, 6257-6272, 10.1039/C3CP54859G, 2014.
- Shastri, L. V., and Huie, R. E.: Rate Constants for Hydrogen Abstraction Reactions of  $\text{NO}_3$  in Aqueous-Solution, *Int J Chem Kinet*, 22, 505-512, 1990.
- Shiraiwa, M., Garland, R. M., and Pöschl, U.: Kinetic double-layer model of aerosol surface chemistry and gas-particle interactions (K2-SURF): Degradation of polycyclic

- aromatic hydrocarbons exposed to O<sub>3</sub>, NO<sub>2</sub>, H<sub>2</sub>O, OH and NO<sub>3</sub>, *Atmos. Chem. Phys.*, 9, 9571-9586, 2009.
- Shiraiwa, M., Pfrang, C., and Pöschl, U.: Kinetic multi-layer model of aerosol surface and bulk chemistry (KM-SUB): the influence of interfacial transport and bulk diffusion on the oxidation of oleic acid by ozone, *Atmos. Chem. Phys.*, 10, 3673-3691, 10.5194/acp-10-3673-2010, 2010.
- Shiraiwa, M., Pöschl, U., and Knopf, D. A.: Multiphase Chemical Kinetics of NO<sub>3</sub> Radicals Reacting with Organic Aerosol Components from Biomass Burning, *Environmental Science & Technology*, 46, 6630-6636, 10.1021/es300677a, 2012.
- Surratt, J. D., Gómez-González, Y., Chan, A. W. H., Vermeulen, R., Shahgholi, M., Kleindienst, T. E., Edney, E. O., Offenberg, J. H., Lewandowski, M., Jaoui, M., Maenhaut, W., Claeys, M., Flagan, R. C., and Seinfeld, J. H.: Organosulfate Formation in Biogenic Secondary Organic Aerosol, *The Journal of Physical Chemistry A*, 112, 8345-8378, 10.1021/jp802310p, 2008.
- Tao, S., Lu, X., Levac, N., Bateman, A. P., Nguyen, T. B., Bones, D. L., Nizkorodov, S. A., Laskin, J., Laskin, A., and Yang, X.: Molecular Characterization of Organosulfates in Organic Aerosols from Shanghai and Los Angeles Urban Areas by Nanospray-Desorption Electrospray Ionization High-Resolution Mass Spectrometry, *Environmental Science & Technology*, 48, 10993-11001, 10.1021/es5024674, 2014.
- Toyota, K., Kanaya, Y., Takahashi, M., and Akimoto, H.: A box model study on photochemical interactions between VOCs and reactive halogen species in the marine boundary layer, *Atmos Chem Phys*, 4, 1961-1987, 2004.
- van Pinxteren, D., Brüggemann, E., Gnauk, T., Iinuma, Y., Müller, K., Nowak, A., Achtert, P., Wiedensohler, A., and Herrmann, H.: Size- and time-resolved chemical particle characterization during CAREBeijing-2006: Different pollution regimes and diurnal profiles, *J Geophys Res-Atmos*, 114, 10.1029/2008JD010890, 2009.
- Wang, X. K., Rossignol, S., Ma, Y., Yao, L., Wang, M. Y., Chen, J. M., George, C., and Wang, L.: Identification of particulate organosulfates in three megacities at the middle and lower reaches of the Yangtze River, *Atmos. Chem. Phys. Discuss.*, 2015, 21415-21448, 10.5194/acpd-15-21415-2015, 2015.
- Wayne, R. P., Barnes, I., Biggs, P., Burrows, J. P., Canosa-Mas, C. E., Hjorth, J., LeBras, G., Moortgat, G. K., Perner, D., Poulet, G., Restelli, G., and Sidebottom, H.: The Nitrate Radical: Physics, Chemistry, and the Atmosphere, *Atmospheric Environment Part A - General Topics*, 25, 1-203, 1991.
- Willoughby, A. S., Wozniak, A. S., and Hatcher, P. G.: A molecular-level approach for characterizing water-insoluble components of ambient organic aerosol particulates using ultrahigh-resolution mass spectrometry, *Atmos Chem Phys*, 14, 10299-10314, 10.5194/acp-14-10299-2014, 2014.
- Wozniak, A. S., Willoughby, A. S., Gurganus, S. C., and Hatcher, P. G.: Distinguishing molecular characteristics of aerosol water soluble organic matter from the 2011 trans-North Atlantic US GEOTRACES cruise, *Atmos Chem Phys*, 14, 8419-8434, 10.5194/acp-14-8419-2014, 2014.
- Xiao, S., and Bertram, A. K.: Reactive uptake kinetics of NO<sub>3</sub> on multicomponent and multiphase organic mixtures containing unsaturated and saturated organics, *Phys. Chem. Chem. Phys.*, 13, 6628-6636, 2011.
- Xu, L., Guo, H., Boyd, C. M., Klein, M., Bougiatioti, A., Cerully, K. M., Hite, J. R., Isaacman-VanWertz, G., Kreisberg, N. M., Knote, C., Olson, K., Koss, A., Goldstein, A. H., Hering, S. V., de Gouw, J., Baumann, K., Lee, S.-H., Nenes, A., Weber, R. J., and Ng, N. L.: Effects of anthropogenic emissions on aerosol formation from isoprene

- and monoterpenes in the southeastern United States, *Proceedings of the National Academy of Sciences*, 112, 37-42, 2015a.
- Xu, L., Suresh, S., Guo, H., Weber, R. J., and Ng, N. L.: Aerosol characterization over the southeastern United States using high-resolution aerosol mass spectrometry: spatial and seasonal variation of aerosol composition and sources with a focus on organic nitrates, *Atmos. Chem. Phys.*, 15, 7307-7336, 10.5194/acp-15-7307-2015, 2015b.
- Yang, X. K., Wang, J. Q., and Wang, T. D.: Rate constants for the reactions of  $\text{NO}_3$  center dot and  $\text{SO}_4$  center dot- radicals with oxalic acid and oxalate anions in aqueous solution, *Chinese Chem Lett*, 15, 583-586, 2004.
- Zellner, R., Herrmann, H., Exner, M., Jacobi, H.-W., Raabe, G., and Reese, A.: Formation and reactions of oxidants in the aqueous phase, in: *Heterogeneous and Liquid Phase Processes*, edited by: Warneck, P., Springer, 146-152, 1996.
- Zhang, P., Sun, W., Li, N., Wang, Y., Shu, J., Yang, B., and Dong, L.: Effects of Humidity and  $\text{NO}_3 / \text{N}_2\text{O}_5$  Ratio on the Heterogeneous Reaction of Fluoranthene and Pyrene with  $\text{N}_2\text{O}_5/\text{NO}_3/\text{NO}_2$ , *Env. Sci. Tech.*, 48, 13130-13137, 10.1021/es504508v, 2014a.
- Zhang, X., Cappa, C. D., Jathar, S. H., McVay, R. C., Ensberg, J. J., Kleeman, M. J., and Seinfeld, J. H.: Influence of vapor wall loss in laboratory chambers on yields of secondary organic aerosol, *Proceedings of the National Academy of Sciences*, 111, 5802-5807, 2014b.
- Zhang, Y., Chapleski, R. C., Lu, J. W., Rockhold, T. H., Troya, D., and Morris, J. R.: Gas-surface reactions of nitrate radicals with vinyl-terminated self-assembled monolayers, *Physical Chemistry Chemical Physics*, 16, 16659-16670, 10.1039/C4CP01982B, 2014c.
- Zhang, Y., and Morris, J. R.: Hydrogen Abstraction Probability in Reactions of Gas-Phase  $\text{NO}_3$  with an OH-Functionalized Organic Surface, *The Journal of Physical Chemistry C*, 119, 14742-14747, 10.1021/acs.jpcc.5b00562, 2015.
- Zhao, Y., Hallar, A. G., and Mazzoleni, L. R.: Atmospheric organic matter in clouds: exact masses and molecular formula identification using ultrahigh-resolution FT-ICR mass spectrometry, *Atmos Chem Phys*, 13, 12343-12362, 10.5194/acp-13-12343-2013, 2013.
- Zhao, Z., Husainy, S., Stoudemayer, C. T., and Smith, G. D.: Reactive uptake of  $\text{NO}_3$  radicals by unsaturated fatty acid particles, *Physical Chemistry Chemical Physics*, 13, 17809-17817, 2011.
